# Supplementary material for: Spatio-temporal spread and evolution of Lassa virus in West Africa
Source: Springer Nature journal article supplement (doi:10.1186/s12879-024-09200-8), 2024-03-14
Supplement: MOESM4 [file 26859776]

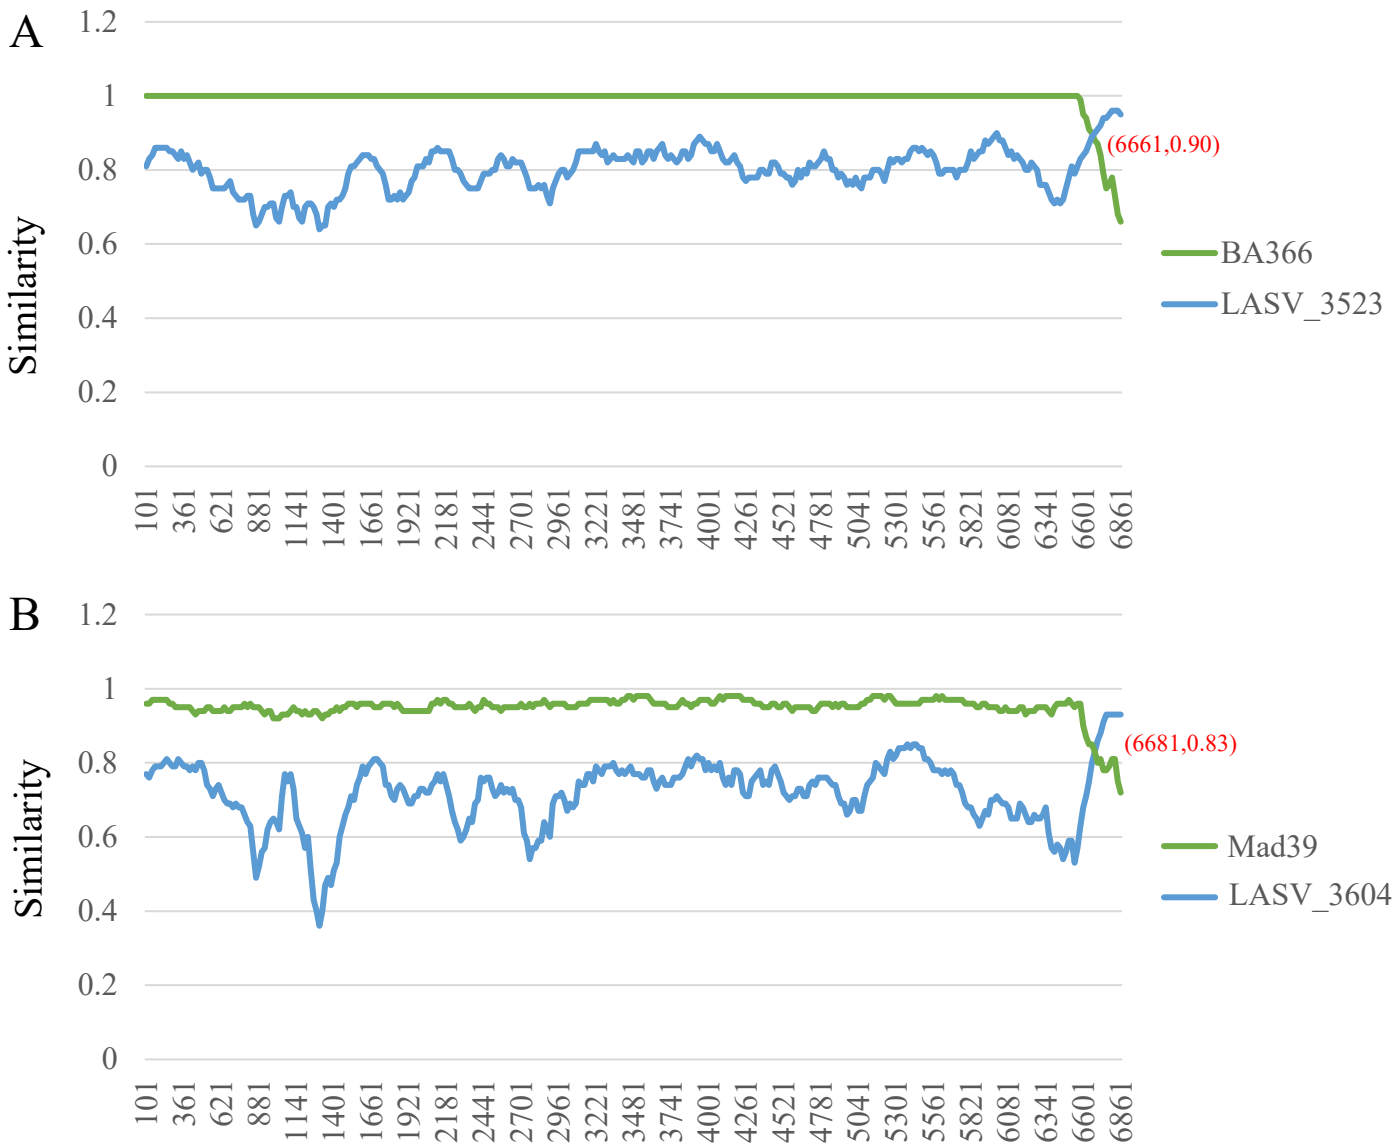

**Figure S2 Similarity between recombined strains and their parents.** The strains LASV\_3713 (A) and LASV\_3523(B) show their own similarity with their parents. The major parent and minor parent are represented by the green line and green blue line, respectively. The red coordinate points represent the breakpoint position and the similarity.
