# Supplementary material for: Spatio-temporal spread and evolution of Lassa virus in West Africa
Source: BMC Infect Dis. 2024 Mar 14;24:314. doi: 10.1186/s12879-024-09200-8 (PMC10941413; doi:10.1186/s12879-024-09200-8)
Supplement: Supplementary file 1 — Supplementary Material 1. [file 12879_2024_9200_MOESM1_ESM.xlsx]

## Sheet: 500 strains
The dataset information used in this study
strain	collection date	host	isolated country
BEN_14_26530	2014_10_23	Human	Benin
BEN_16069	2016_02_23	Human	Benin
BEN_16070	2016_01_29	Human	Benin
BEN_16071	2016_02_07	Human	Benin
BEN_16081	2016_01_30	Human	Benin
BEN_16082	2016_03_05	Human	Benin
BEN_16090	2016_03_13	Human	Benin
BEN_16131	2016_04_10	Human	Benin
LASV_3604	2015_08_28	Mouse	Cote_dIvoire
LASV_3625	2015_08_29	Mouse	Cote_dIvoire
LASV_3713	2015_09_07	Mouse	Cote_dIvoire
LASV_3715	2015_09_07	Mouse	Cote_dIvoire
LASV_3523	2015_08_24	Mouse	Cote_dIvoire
H.sapiens-wt/NGA/2018/LASV0106-ONDO-2017	2017-12-17	Human	Nigeria
H.sapiens-wt/NGA/2018/LASV0095-EDO-2017	2017-09-14	Human	Nigeria
Mad41	2014-05-08	Mouse	Guinea
G3234-SLE-2013	2013	Human	Sierra-Leone
LASV967-NIG-2009	2009	Human	Nigeria
LASV/H.sapiens-wt/NGA/2018/IRR-092	2018-02-15	Human	Nigeria
807988	1996	Human	Guinea
LASV/H.sapiens-tc/NGA/2013/IRR-007	2013-02-03	Human	Nigeria
CSF	NA	Unknown	NA
LASV/H.sapiens-tc/NGA/2015/IRR-012	2015-11-06	Human	Nigeria
Nig08-A41	2008	Human	Nigeria
ISTH1003-NIG-2011	2011	Human	Nigeria
808714	1980	Human	Sierra-Leone
ISTH2129-NIG-2012	2012	Human	Nigeria
H.sapiens-wt/NGA/2018/LASV0169-ONDO-2018	2018-02-11	Human	Nigeria
LASV/H.sapiens-tc/NGA/2017/IRR-015	2017	Human	Nigeria
G2280-SLE-2012	2012	Human	Sierra-Leone
H.sapiens-wt/NGA/2018/LASV0122-ONDO-2018	2018-01-11	Human	Nigeria
LASV045-NIG-2009	2009	Human	Nigeria
812673	2015	Human	Liberia
H.sapiens-wt/NGA/2018/LASV0162-ONDO-2018	2018-02-09	Human	Nigeria
LASV/H.sapiens-tc/NGA/2016/IRR-026	2016-02-26	Human	Nigeria
G2197-SLE-2011	2011	Human	Sierra-Leone
H.sapiens-wt/NGA/2018/LASV0155-EDO-2018	2018-02-05	Human	Nigeria
LASV/H.sapiens-tc/NGA/2016/IRR-012	2016-01-25	Human	Nigeria
G692-SLE-2009	2009	Human	Sierra-Leone
Lassa-virus/H.sapiens-wt/NGA/2016/ISTH-0703	2016-02-24	Human	Nigeria
H.sapiens-wt/NGA/2018/LASV0068-ONDO-2017	2017-01-26	Human	Nigeria
LASV993-NIG-2009	2009	Human	Nigeria
ISTH1129-NIG-2012	2012	Human	Nigeria
H.sapiens-wt/NGA/2018/LASV0170-ONDO-2018	2018-02-11	Human	Nigeria
H.sapiens-wt/NGA/2018/LASV0163-ONDO-2018	2018-02-09	Human	Nigeria
G2427-SLE-2012	2012	Human	Sierra-Leone
H.sapiens-wt/NGA/2018/LASV0082-EDO-2017	2017-06-07	Human	Nigeria
807987	1981	Human	Liberia
Nig16-13	2016	Human	Nigeria
H.sapiens-wt/NGA/2018/LASV0135-ONDO-2018	2018-01-17	Human	Nigeria
LF17020	2017-05-02	Human	Liberia
ISTH2312-NIG-2012	2012	Human	Nigeria
G3148-SLE-2013	2013	Human	Sierra-Leone
Alzey	NA	Unknown	NA
ISTH2094-NIG-2012	2012	Human	Nigeria
G1442-SLE-2011	2011	Human	Sierra-Leone
LASV/H.sapiens-tc/NGA/2016/IRR-007	2016-01-18	Human	Nigeria
LASV/H.sapiens-tc/NGA/2013/IRR-014	2013-11-23	Human	Nigeria
H.sapiens-wt/NGA/2018/LASV0192.2-ONDO-2018	2018-02-28	Human	Nigeria
H.sapiens-wt/NGA/2018/LASV0129-ONDO-2018	2018-01-13	Human	Nigeria
LASV/H.sapiens-tc/NGA/2015/IRR-008	2015-04-10	Human	Nigeria
LASV/H.sapiens-wt/NGA/2018/IRR-011	2018-01-13	Human	Nigeria
ISTH2376-NIG-2012	2012	Human	Nigeria
H.sapiens-wt/NGA/2018/LASV0081-EDO-2017	2017-06-05	Human	Nigeria
G2868-SLE-2012	2012	Human	Sierra-Leone
G2565-SLE-2012	2012	Human	Sierra-Leone
806829	1981	Human	Liberia
LASV/H.sapiens-tc/NGA/2016/IRR-010	2016-01-22	Human	Nigeria
LASV/H.sapiens-wt/NGA/2018/IRR-010	2018-01-12	Human	Nigeria
LASV711-NIG-2009	2009	Human	Nigeria
ISTH2042-NIG-2012	2012	Human	Nigeria
G3151-SLE-2013	2013	Human	Sierra-Leone
LASV245-NIG-2011	2011	Human	Nigeria
Nig16-11	2016	Human	Nigeria
LASV/H.sapiens-tc/NGA/2013/IRR-008	2013-03-06	Human	Nigeria
ISTH1069-NIG-2011	2011	Human	Nigeria
H.sapiens-wt/NGA/2018/LASV0120-ONDO-2018	2018-01-11	Human	Nigeria
LF16016	2016-04-13	Human	Liberia
LASV/H.sapiens-tc/NGA/2016/IRR-003	2016-01-04	Human	Nigeria
LASV/H.sapiens-wt/NGA/2018/IRR-072	2018-02-12	Human	Nigeria
Lassa-virus/H.sapiens-wt/NGA/2016/ISTH-1311	2016-06-10	Human	Nigeria
G693-SLE-2009	2009	Human	Sierra-Leone
H.sapiens-wt/NGA/2018/LASV0200-UNKNOWN-2018	2018-02-21	Human	Nigeria
LASV242-NIG-2010	2010	Human	Nigeria
LASV/H.sapiens-tc/NGA/2016/IRR-009	2016-01-20	Human	Nigeria
LASV229-NIG-2010	2010	Human	Nigeria
H.sapiens-wt/NGA/2018/LASV0185-ONDO-2018	2018-02-13	Human	Nigeria
LASV1011-NIG-2009	2009	Human	Nigeria
H.sapiens-wt/NGA/2018/LASV0214-KOGI-2018	2018-03-18	Human	Nigeria
H.sapiens-wt/NGA/2018/LASV0188-ONDO-2018	2018-02-14	Human	Nigeria
LASV/H.sapiens-wt/NGA/2018/IRR-023	2018-01-18	Human	Nigeria
H.sapiens-wt/NGA/2018/LASV0183-ONDO-2018	2018-02-13	Human	Nigeria
Nig08-A37	2008	Human	Nigeria
G3229-SLE-2013	2013	Human	Sierra-Leone
803204	1972	Human	Liberia
LF18002	2018-01-10	Human	Liberia
LASV/H.sapiens-wt/NGA/2018/IRR-001-I	2018-01-02	Human	Nigeria
H.sapiens-wt/NGA/2018/LASV0119-EDO-2018	2018-01-09	Human	Nigeria
LASV/H.sapiens-wt/NGA/2018/IRR-121	2018-02-26	Human	Nigeria
LASV/H.sapiens-tc/NGA/2014/IRR-007	2014-05-14	Human	Nigeria
LM776-SLE-2012	2012	Mouse	Sierra-Leone
ISTH2271-NIG-2012	2012	Human	Nigeria
Lassa-virus/H.sapiens-wt/NGA/2018/ISTH-0959	2018-02-12	Human	Nigeria
H.sapiens-wt/NGA/2018/LASV0089-ONDO-2017	2017-07-05	Human	Nigeria
LASV/H.sapiens-tc/NGA/2014/IRR-010	2014-05-17	Human	Nigeria
LASV056-NIG-2008	2008	Human	Nigeria
LASV/H.sapiens-wt/NGA/2018/IRR-074	2018-02-12	Human	Nigeria
G2363-SLE-2012	2012	Human	Sierra-Leone
LASV/H.sapiens-wt/NGA/2018/IRR-051	2018-02-06	Human	Nigeria
811606	2010	Human	Liberia
G2147-SLE-2011	2011	Human	Sierra-Leone
LASV046-NIG-2009	2009	Human	Nigeria
H.sapiens-wt/NGA/2018/LASV0173-EDO-2018	2018-02-12	Human	Nigeria
LF16004	2016-02-26	Human	Liberia
LASV/H.sapiens-tc/NGA/2013/IRR-001	2013-01-16	Human	Nigeria
LF18041	2018-03-03	Human	Liberia
ISTH1038-NIG-2011	2011	Human	Nigeria
ISTH1107-NIG-2012	2012	Human	Nigeria
LASV/H.sapiens-wt/NGA/2018/IRR-025	2018-01-19	Human	Nigeria
Lassa-virus/H.sapiens-wt/NGA/2016/ISTH-1568	2016-10-27	Human	Nigeria
H.sapiens-wt/NGA/2018/LASV0140-EDO-2018	2018-01-18	Human	Nigeria
LASV/H.sapiens-wt/NGA/2018/IRR-057	2018-02-09	Human	Nigeria
Nig12-17	2012	Human	Nigeria
LASV/H.sapiens-wt/NGA/2018/IRR-083	2018-02-13	Human	Nigeria
Soromba-R	2009-06-01	Mouse	Mali
LF17007	2017-01-09	Human	Liberia
H.sapiens-wt/NGA/2018/LASV0069-EDO-2017	2017-02-07	Human	Nigeria
LASV/H.sapiens-tc/NGA/2011/IRR-001	2011-08-02	Human	Nigeria
LASV/H.sapiens-wt/NGA/2018/IRR-131-I	2018-03-01	Human	Nigeria
Macenta	2013-05-26	Mouse	Ghana
LASV/H.sapiens-wt/NGA/2018/IRR-084	2018-02-13	Human	Nigeria
LASV/H.sapiens-tc/NGA/2012/IRR-010	2012-05-28	Human	Nigeria
H.sapiens-wt/NGA/2018/LASV0167-ONDO-2018	2018-02-10	Human	Nigeria
IRF0205	1976-03-01	Human	Sierra-Leone
807876	1981	Human	Nigeria
Nig16-02	2016	Human	Nigeria
LASV/H.sapiens-wt/NGA/2018/IRR-095	2018-02-15	Human	Nigeria
G2615-SLE-2012	2012	Human	Sierra-Leone
IRF0201	1976-03-01	Human	Sierra-Leone
ISTH2025-NIG-2012	2012	Human	Nigeria
LASV/H.sapiens-tc/NGA/2016/IRR-014	2016-01-28	Human	Nigeria
G1190-SLE-2010	2010	Human	Sierra-Leone
H.sapiens-wt/NGA/2018/LASV0158-EDO-2018	2018-02-06	Human	Nigeria
LASV979-NIG-2009	2009	Human	Nigeria
LASV241-NIG-2011	2011	Human	Nigeria
Lassa-virus/H.sapiens-wt/NGA/2016/ISTH-0753	2016-02-28	Human	Nigeria
LASV/H.sapiens-tc/NGA/2016/IRR-027	2016-02-28	Human	Nigeria
G2405-SLE-2012	2012	Human	Sierra-Leone
LASV981-NIG-2009	2009	Human	Nigeria
H.sapiens-wt/NGA/2018/LASV0090-ONDO-2017	2017-07-19	Human	Nigeria
Lassa/H.sapiens-wt/TGO/2016/201600568	2016-03-12	Human	Togo
LASV/H.sapiens-tc/NGA/2016/IRR-015	2016-02-03	Human	Nigeria
H.sapiens-wt/NGA/2018/LASV0074-EDO-2017	2017-03-12	Human	Nigeria
Nig08-A18	2008	Human	Nigeria
G2392-SLE-2012	2012	Human	Sierra-Leone
LASV/H.sapiens-wt/NGA/2018/IRR-048	2018-02-04	Human	Nigeria
H.sapiens-wt/NGA/2018/LASV0136-ONDO-2018	2018-01-17	Human	Nigeria
Lassa-virus/H.sapiens-wt/NGA/2016/ISTH-1123	2016-04-21	Human	Nigeria
H.sapiens-wt/NGA/2018/LASV0132-ONDO-2018	2018-01-15	Human	Nigeria
ISTH0073-NIG-2011	2011	Human	Nigeria
H.sapiens-wt/NGA/2018/LASV0067-EDO-2017	2017-01-24	Human	Nigeria
LASV/H.sapiens-tc/NGA/2014/IRR-011	2014-08-01	Human	Nigeria
H.sapiens-wt/NGA/2018/LASV0125-EBONYI-2018	2018-01-13	Human	Nigeria
IRF0193	1976-03-01	Human	Sierra-Leone
LASV256-NIG-2010	2010	Human	Nigeria
LASV1015-NIG-2009	2009	Human	Nigeria
LASV/H.sapiens-tc/NGA/2012/IRR-001	2012-02-08	Human	Nigeria
Lassa-virus/H.sapiens-wt/NGA/2016/ISTH-0035	2016-01-06	Human	Nigeria
recombinant-Josiah	NA	Unknown	NA
Nig14-09	2014	Human	Nigeria
LASV/H.sapiens-tc/NGA/2017/IRR-016	2017	Human	Nigeria
G3248-SLE-2013	2013	Human	Sierra-Leone
LASV/H.sapiens-wt/NGA/2018/IRR-013	2018-01-13	Human	Nigeria
H.sapiens-wt/NGA/2018/LASV0085-EDO-2017	2017-06-17	Human	Nigeria
LASV/H.sapiens-wt/NGA/2018/IRR-033	2018-01-25	Human	Nigeria
LASV/H.sapiens-wt/NGA/2018/IRR-006	2018-01-09	Human	Nigeria
810801	1974	Human	Nigeria
Togo/2016/7082	2016-02-26	Human	Togo
H.sapiens-wt/NGA/2018/LASV0094-KOGI-2017	2017-09-02	Human	Nigeria
LASV971-NIG-2009	2009	Human	Nigeria
ISTH2334-NIG-2012	2012	Human	Nigeria
G771-SLE-2010	2010	Human	Sierra-Leone
H.sapiens-wt/NGA/2018/LASV0131-ONDO-2018	2018-01-15	Human	Nigeria
H.sapiens-wt/NGA/2018/LASV0217-DELTA-2018	2018-03-27	Human	Nigeria
LASV/H.sapiens-tc/NGA/2016/IRR-020	2016-02-15	Human	Nigeria
KAK-428	2012-03-15	Rodent	Nigeria
LASV/H.sapiens-wt/NGA/2018/IRR-014-I	2018-01-15	Human	Nigeria
ISTH0009-NIG-2011	2011	Human	Nigeria
LASV/H.sapiens-wt/NGA/2018/IRR-017	2018-01-15	Human	Nigeria
ISTH0012-NIG-2011	2011	Human	Nigeria
LASV063-NIG-2009	2009	Human	Nigeria
LASV/H.sapiens-wt/NGA/2018/IRR-106	2018-02-20	Human	Nigeria
LASV977-NIG-2009	2009	Human	Nigeria
LASV049-NIG-2009	2009	Human	Nigeria
ISTH0230-NIG-2011	2011	Human	Nigeria
LASV058-NIG-2008	2008	Human	Nigeria
G3106-SLE-2013	2013	Human	Sierra-Leone
LASV/H.sapiens-wt/NGA/2018/IRR-052	2018-02-07	Human	Nigeria
LASV253-NIG-2011	2011	Human	Nigeria
H.sapiens-wt/NGA/2018/LASV0104-ONDO-2017	2017-12-12	Human	Nigeria
H.sapiens-wt/NGA/2018/LASV0193.2-DELTA-2018	2018-02-21	Human	Nigeria
ISTH2016-NIG-2012	2012	Human	Nigeria
Lassa-virus/H.sapiens-wt/NGA/2018/ISTH-1079	2018-02-15	Human	Nigeria
LASV/H.sapiens-wt/NGA/2018/IRR-131	2018-03-01	Human	Nigeria
LASV/H.sapiens-wt/NGA/2018/IRR-031	2018-01-24	Human	Nigeria
H.sapiens-wt/NGA/2018/LASV0072-ONDO-2017	2017-02-14	Human	Nigeria
806593	1989	Human	Nigeria
G3016-SLE-2013	2013	Human	Sierra-Leone
G1792-SLE-2011	2011	Human	Sierra-Leone
G1180-SLE-2010	2010	Human	Sierra-Leone
BA366	2003	Mouse	Guinea
H.sapiens-wt/NGA/2018/LASV0192-ONDO-2018	2018-02-16	Human	Nigeria
806827	1977	Human	Sierra-Leone
Lassa-virus/H.sapiens-wt/NGA/2018/ISTH-0097	2018-01-15	Human	Nigeria
G2263-SLE-2012	2012	Human	Sierra-Leone
H.sapiens-wt/NGA/2018/LASV0105-ONDO-2017	2017-12-17	Human	Nigeria
G2723-SLE-2012	2012	Human	Sierra-Leone
G733-SLE-2010	2010	Human	Sierra-Leone
LASV/H.sapiens-wt/NGA/2018/IRR-115-I	2018-02-21	Human	Nigeria
LASV991-NIG-2009	2009	Human	Nigeria
ISTH2358-NIG-2012	2012	Human	Nigeria
LASV/H.sapiens-wt/NGA/2017/IRR-006	2017-01-19	Human	Nigeria
Nig16-14	2016	Human	Nigeria
G2318-SLE-2012	2012	Human	Sierra-Leone
H.sapiens-wt/NGA/2018/LASV0103-EDO-2017	2017-11-29	Human	Nigeria
LASV/H.sapiens-wt/NGA/2018/IRR-046	2018-02-05	Human	Nigeria
H.sapiens-wt/NGA/2018/LASV0071-EDO-2017	2017-02-14	Human	Nigeria
ISTH2037-NIG-2012	2012	Human	Nigeria
LASV/H.sapiens-wt/NGA/2018/IRR-063	2018-02-07	Human	Nigeria
LASV/H.sapiens-tc/NGA/2015/IRR-011	2015-09-16	Human	Nigeria
H.sapiens-wt/NGA/2018/LASV0086-EDO-2017	2017-06-25	Human	Nigeria
Z148	NA	Unknown	NA
H.sapiens-wt/NGA/2018/LASV0097-EDO-2017	2017-10-06	Human	Nigeria
LASV006-NIG-2008	2008	Human	Nigeria
G3278-SLE-2013	2013	Human	Sierra-Leone
812285	1976	Human	Nigeria
Mad62	2014-05-09	Mouse	Guinea
Pinneo-NIG-1969	1969	Human	Nigeria
H.sapiens-wt/NGA/2018/LASV0145-EDO-2018	2018-01-23	Human	Nigeria
Nig14-03	2014	Human	Nigeria
LASV/H.sapiens-wt/NGA/2018/IRR-044	2018-01-30	Human	Nigeria
812337	2014	Human	Liberia
H.sapiens-wt/NGA/2018/LASV0193-DELTA-2018	2018-02-17	Human	Nigeria
LASV/H.sapiens-wt/NGA/2018/IRR-020	2018-01-17	Human	Nigeria
H.sapiens-wt/NGA/2018/LASV0137-ONDO-2018	2018-01-17	Human	Nigeria
H.sapiens-wt/NGA/2018/LASV0065-ONDO-2017	2017-01-09	Human	Nigeria
Lassa-virus/H.sapiens-wt/NGA/2018/ISTH-0664	2018-02-04	Human	Nigeria
Lassa-virus/H.sapiens-wt/NGA/2016/ISTH-1207	2016-05-03	Human	Nigeria
H.sapiens-wt/NGA/2018/LASV0112-ONDO-2017	2017-12-29	Human	Nigeria
ONM-700	2012-10-29	Mouse	Nigeria
Nig08-A47	2008	Human	Nigeria
LASV/H.sapiens-tc/NGA/2016/IRR-008	2016-01-20	Human	Nigeria
G2222-SLE-2011	2011	Human	Sierra-Leone
H.sapiens-wt/NGA/2018/LASV0080-ONDO-2017	2017-05-16	Human	Nigeria
H.sapiens-wt/NGA/2018/LASV0182-EDO-2018	2018-02-13	Human	Nigeria
Lassa-virus/H.sapiens-wt/NGA/2018/ISTH-1177	2018-02-18	Human	Nigeria
G3170-SLE-2013	2013	Human	Sierra-Leone
LASV/H.sapiens-wt/NGA/2018/IRR-117	2018-02-24	Human	Nigeria
ISTH2046-NIG-2012	2012	Human	Nigeria
H.sapiens-wt/NGA/2018/LASV0168-DELTA-2018	2018-02-10	Human	Nigeria
Komina-R16	2012-03-03	Mouse	Mali
H.sapiens-wt/NGA/2018/LASV0127-EBONYI-2018	2018-01-13	Human	Nigeria
LASV/H.sapiens-wt/NGA/2018/IRR-036	2018-01-26	Human	Nigeria
LASV225-NIG-2010	2010	Human	Nigeria
H.sapiens-wt/NGA/2018/LASV0155.2-EDO-2018	2018-02-16	Human	Nigeria
Lassa-virus/H.sapiens-wt/NGA/2016/ISTH-1496	2016-09-21	Human	Nigeria
IRF0185	NA	Human	Guinea
G1959-SLE-2011	2011	Human	Sierra-Leone
LASV/H.sapiens-wt/NGA/2018/IRR-021	2018-01-18	Human	Nigeria
Nig14-06	2014	Human	Nigeria
H.sapiens-wt/NGA/2018/LASV0216-EDO-2018	2018-03-23	Human	Nigeria
LF13007	2013-04-29	Human	Liberia
LASV982-NIG-2009	2009	Human	Nigeria
H.sapiens-wt/NGA/2018/LASV0088-EDO-2017	2017-06-27	Human	Nigeria
H.sapiens-wt/NGA/2018/LASV0139-NASARAWA-2018	2018-01-18	Human	Nigeria
LASV246-NIG-2010	2010	Human	Nigeria
LF17001	2017-01-09	Human	Liberia
LASV/H.sapiens-wt/NGA/2018/IRR-050	2018-02-05	Human	Nigeria
ISTH1058-NIG-2011	2011	Human	Nigeria
LASV/H.sapiens-wt/NGA/2018/IRR-103	2018-02-18	Human	Nigeria
Z0947-SLE-2011	2011	Mouse	Sierra-Leone
G610-SLE-2009	2009	Human	Sierra-Leone
LASV/H.sapiens-tc/NGA/2015/IRR-010	2015-07-02	Human	Nigeria
LASV/H.sapiens-tc/NGA/2016/IRR-032	2016-03-13	Human	Nigeria
LASV/H.sapiens-tc/NGA/2014/IRR-008	2014-05-15	Human	Nigeria
Lassa/H.sapiens-tc/TGO/2016/812939	2016-03-12	Human	Togo
ISTH2065-NIG-2012	2012	Human	Nigeria
Mad63	2014-05-09	Mouse	Guinea
Nig08-04	2008	Human	Nigeria
LASV/H.sapiens-wt/NGA/2018/IRR-009	2018-01-13	Human	Nigeria
LASV271-NIG-2010	2010	Human	Nigeria
Mad83	2014-05-10	Mouse	Guinea
LASV/H.sapiens-tc/NGA/2016/IRR-023	2016-02-23	Human	Nigeria
H.sapiens-wt/NGA/2018/LASV0166-ONDO-2018	2018-02-10	Human	Nigeria
LF18001	2018-01-10	Human	Liberia
ISTH2316-NIG-2012	2012	Human	Nigeria
LASV/H.sapiens-wt/NGA/2018/IRR-060	2018-02-03	Human	Nigeria
ISTH2066-NIG-2012	2012	Human	Nigeria
H.sapiens-wt/NGA/2018/LASV0194-EDO-2018	2018-02-17	Human	Nigeria
H.sapiens-wt/NGA/2018/LASV0141-EDO-2018	2018-01-19	Human	Nigeria
H.sapiens-wt/NGA/2018/LASV0123-ONDO-2018	2018-01-12	Human	Nigeria
LASV/H.sapiens-wt/NGA/2018/IRR-099	2018-02-15	Human	Nigeria
ISTH2031-NIG-2012	2012	Human	Nigeria
LASV1008-NIG-2009	2009	Human	Nigeria
LASV737-NIG-2009	2009	Human	Nigeria
H.sapiens-wt/NGA/2018/LASV0073-EDO-2017	2017-03-07	Human	Nigeria
LASV042-NIG-2009	2009	Human	Nigeria
LM395-SLE-2009	2009	Mouse	Sierra-Leone
G2903-SLE-2012	2012	Human	Sierra-Leone
H.sapiens-wt/NGA/2018/LASV0124-UNKNOWN-2018	2018-01-13	Human	Nigeria
ONM-314	2011-10-24	Mouse	Nigeria
LF18037	2018-02-13	Human	Liberia
Lassa-virus/H.sapiens-wt/NGA/2016/ISTH-1610	2016-11-07	Human	Nigeria
G3206-SLE-2013	2013	Human	Sierra-Leone
LASV/H.sapiens-wt/NGA/2018/IRR-035	2018-01-23	Human	Nigeria
LF18042	2018-03-01	Human	Liberia
Z0948-SLE-2011	2011	Mouse	Sierra-Leone
G1529-SLE-2011	2011	Human	Sierra-Leone
LASV267-NIG-2010	2010	Human	Nigeria
ONM-299	2011-10-23	Mouse	Nigeria
G503-SLE-2009	2009	Human	Sierra-Leone
LASV/H.sapiens-tc/NGA/2014/IRR-006	2014-05-14	Human	Nigeria
Josiah-GPA	2011	Guinea-Pig	NA
LASV/H.sapiens-wt/NGA/2018/IRR-073	2018-02-12	Human	Nigeria
H.sapiens-wt/NGA/2018/LASV0175-EDO-2018	2018-02-12	Human	Nigeria
LASV/H.sapiens-wt/NGA/2018/IRR-066	2018-02-10	Human	Nigeria
Lassa-virus/H.sapiens-wt/NGA/2016/ISTH-1398	2016-07-31	Human	Nigeria
H.sapiens-wt/NGA/2018/LASV0133-EDO-2018	2018-01-16	Human	Nigeria
ISTH0595-NIG-2011	2011	Human	Nigeria
ISTH2061-NIG-2012	2012	Human	Nigeria
H.sapiens-wt/NGA/2018/LASV0101-EDO-2017	2017-11-10	Human	Nigeria
LASV/H.sapiens-wt/NGA/2018/IRR-126	2018-02-28	Human	Nigeria
LASV/H.sapiens-wt/NGA/2018/IRR-021-I	2018-01-18	Human	Nigeria
G2184-SLE-2011	2011	Human	Sierra-Leone
LASV/H.sapiens-tc/NGA/2013/IRR-005	2013-01-25	Human	Nigeria
LF2384-NS-DIA-1	2012	Human	Sierra-Leone
Lassa-virus/H.sapiens-wt/NGA/2016/ISTH-1026	2016-04-04	Human	Nigeria
ISTH2020-NIG-2012	2012	Human	Nigeria
LASV/H.sapiens-tc/NGA/2015/IRR-009	2015-04-25	Human	Nigeria
H.sapiens-wt/NGA/2018/LASV0079-EDO-2017	2017-05-15	Human	Nigeria
Bamba-R114	2012-03-01	Mouse	Mali
H.sapiens-wt/NGA/2018/LASV0066-EDO-2017	2017-01-21	Human	Nigeria
H.sapiens-wt/NGA/2018/LASV0215-ONDO-2018	2018-03-21	Human	Nigeria
LASV/H.sapiens-wt/NGA/2018/IRR-114	2018-02-21	Human	Nigeria
Nig14-19	2014	Human	Nigeria
G1960-SLE-2011	2011	Human	Sierra-Leone
H.sapiens-wt/NGA/2018/LASV0177-EDO-2018	2018-02-12	Human	Nigeria
LASV/H.sapiens-wt/NGA/2018/IRR-119-I	2018-02-25	Human	Nigeria
G2944-SLE-2012	2012	Human	Sierra-Leone
LF17019	2017-05-04	Human	Liberia
LASV992-NIG-2009	2009	Human	Nigeria
G1646-SLE-2011	2011	Human	Sierra-Leone
H.sapiens-wt/NGA/2018/LASV0154-TARABA-2018	2018-02-04	Human	Nigeria
LASV/H.sapiens-tc/NGA/2016/IRR-019	2016-02-12	Human	Nigeria
LASV/H.sapiens-tc/NGA/2016/IRR-013	2016-01-27	Human	Nigeria
LF18040	2018-03-02	Human	Liberia
LASV052-NIG-2008	2008	Human	Nigeria
Lassa-virus/H.sapiens-wt/NGA/2018/ISTH-1375	2018-02-23	Human	Nigeria
LASV/H.sapiens-wt/NGA/2018/IRR-075-I	2018-02-12	Human	Nigeria
G2259-SLE-2012	2012	Human	Sierra-Leone
LASV/H.sapiens-tc/NGA/2014/IRR-012	2014-08-10	Human	Nigeria
H.sapiens-wt/NGA/2018/LASV0098-EDO-2017	2017-10-16	Human	Nigeria
LASV/H.sapiens-wt/NGA/2018/IRR-015	2018-01-16	Human	Nigeria
G502-SLE-2009	2009	Human	Sierra-Leone
G2431-SLE-2012	2012	Human	Sierra-Leone
ISTH2304-NIG-2012	2012	Human	Nigeria
H.sapiens-wt/NGA/2018/LASV0146-EDO-2018	2018-01-24	Human	Nigeria
H.sapiens-wt/NGA/2018/LASV0117-ONDO-2018	2018-01-07	Human	Nigeria
H.sapiens-wt/NGA/2018/LASV0099-EDO-2017	2017-10-17	Human	Nigeria
G2554-SLE-2012	2012	Human	Sierra-Leone
H.sapiens-wt/NGA/2018/LASV0078-ONDO-2017	2017-05-07	Human	Nigeria
LASV/H.sapiens-wt/NGA/2018/IRR-119	2018-02-25	Human	Nigeria
806387	1981	Human	Guinea
Nig08-A19	2008	Human	Nigeria
H.sapiens-wt/NGA/2018/LASV0207-ONDO-2018	2018-02-28	Human	Nigeria
LASV/H.sapiens-wt/NGA/2014/IRR-001	2014-01-25	Human	Nigeria
LASV/H.sapiens-tc/NGA/2014/IRR-009	2014-05-17	Human	Nigeria
ISTH2010-NIG-2012	2012	Human	Nigeria
Mad69	2014-05-09	Mouse	Guinea
ISTH1096-NIG-2012	2012	Human	Nigeria
LASV/H.sapiens-wt/NGA/2018/IRR-126-I	2018-02-28	Human	Nigeria
H.sapiens-wt/NGA/2018/LASV0206-EDO-2018	2018-02-25	Human	Nigeria
G676-SLE-2009	2009	Human	Sierra-Leone
H.sapiens-wt/NGA/2018/LASV0118-EDO-2018	2018-01-09	Human	Nigeria
LASV250-NIG-2011	2011	Human	Nigeria
Lassa-virus/H.sapiens-wt/NGA/2016/ISTH-1423	2016-08-16	Human	Nigeria
G2315-SLE-2012	2012	Human	Sierra-Leone
G1647-SLE-2011	2011	Human	Sierra-Leone
H.sapiens-wt/NGA/2018/LASV0172-ONDO-2018	2018-02-12	Human	Nigeria
G808-SLE-2010	2010	Human	Sierra-Leone
IRF0172	1976-03-01	Human	Sierra-Leone
G2587-SLE-2012	2012	Human	Sierra-Leone
H.sapiens-wt/NGA/2018/LASV0111-ONDO-2017	2017-12-28	Human	Nigeria
806568	1979	Human	Sierra-Leone
LASV/H.sapiens-tc/NGA/2016/IRR-028	2016-02-29	Human	Nigeria
ISTH0047-NIG-2011	2011	Human	Nigeria
ISTH1048-NIG-2011	2011	Human	Nigeria
LASV/H.sapiens-tc/NGA/2013/IRR-016	2013-12-08	Human	Nigeria
G3010-SLE-2013	2013	Human	Sierra-Leone
Lassa-virus/H.sapiens-wt/NGA/2016/ISTH-0017	2016-01-04	Human	Nigeria
H.sapiens-wt/NGA/2018/LASV0160-KOGI-2018	2018-02-06	Human	Nigeria
LASV/H.sapiens-tc/NGA/2016/IRR-017	2016-02-06	Human	Nigeria
LASV975-NIG-2009	2009	Human	Nigeria
G1774-SLE-2011	2011	Human	Sierra-Leone
G1618-SLE-2011	2011	Human	Sierra-Leone
G2295-SLE-2012	2012	Human	Sierra-Leone
Lassa-virus/H.sapiens-wt/NGA/2016/ISTH-0919	2016-03-16	Human	Nigeria
H.sapiens-wt/NGA/2018/LASV0091-EDO-2017	2017-08-03	Human	Nigeria
LASV/H.sapiens-tc/NGA/2015/IRR-014	2015-12-30	Human	Nigeria
H.sapiens-wt/NGA/2018/LASV0092-EDO-2017	2017-08-04	Human	Nigeria
LASV/H.sapiens-tc/NGA/2014/IRR-002	2014-01-20	Human	Nigeria
G636-SLE-2009	2009	Human	Sierra-Leone
LASV/H.sapiens-tc/NGA/2013/IRR-006	2013-01-30	Human	Nigeria
LASV/H.sapiens-wt/NGA/2018/IRR-024	2018-01-19	Human	Nigeria
LASV/H.sapiens-tc/NGA/2014/IRR-005	2014-05-14	Human	Nigeria
H.sapiens-wt/NGA/2018/LASV0102-ONDO-2017	2017-11-26	Human	Nigeria
LASV/H.sapiens-wt/NGA/2018/IRR-073-I	2018-02-12	Human	Nigeria
LASV1016-NIG-2009	2009	Human	Nigeria
Lassa-virus/H.sapiens-wt/NGA/2016/ISTH-1472	2016-09-13	Human	Nigeria
LASV/H.sapiens-wt/NGA/2018/IRR-022	2018-01-17	Human	Nigeria
H.sapiens-wt/NGA/2018/LASV0075-EDO-2017	2017-03-15	Human	Nigeria
LASV/H.sapiens-tc/NGA/2016/IRR-004	2016-01-05	Human	Nigeria
IRF0194	NA	Human	Guinea
LASV254-NIG-2011	2011	Human	Nigeria
H.sapiens-wt/NGA/2018/LASV0201-ONDO-2018	2018-02-21	Human	Nigeria
LASV966-NIG-2009	2009	Human	Nigeria
H.sapiens-wt/NGA/2018/LASV0147-EDO-2018	2018-01-26	Human	Nigeria
LASV/H.sapiens-wt/NGA/2016/IRR-001	2016-01-04	Human	Nigeria
LASV/H.sapiens-wt/NGA/2018/IRR-074-I	2018-02-12	Human	Nigeria
LASV1000-NIG-2009	2009	Human	Nigeria
LASV/H.sapiens-tc/NGA/2016/IRR-018	2016-02-09	Human	Nigeria
LASV976-NIG-2009	2009	Human	Nigeria
H.sapiens-wt/NGA/LASV-SM3	2014	Human	Nigeria
LASV/H.sapiens-tc/NGA/2016/IRR-025	2016-02-26	Human	Nigeria
H.sapiens-wt/NGA/2018/LASV0138-KOGI-2018	2018-01-17	Human	Nigeria
ISTH2057-NIG-2012	2012	Human	Nigeria
LASV/H.sapiens-wt/NGA/2018/IRR-075	2018-02-12	Human	Nigeria
LASV978-NIG-2009	2009	Human	Nigeria
ISTH1111-NIG-2011	2011	Human	Nigeria
LASV/H.sapiens-tc/NGA/2016/IRR-029	2016-03-01	Human	Nigeria
H.sapiens-wt/NGA/LASV-SM2	2014	Human	Nigeria
LASV237-NIG-2010	2010	Human	Nigeria
LASV/H.sapiens-tc/NGA/2016/IRR-011	2016-01-24	Human	Nigeria
LASV/H.sapiens-tc/NGA/2016/IRR-016	2016-02-06	Human	Nigeria
LASV/H.sapiens-wt/NGA/2018/IRR-086	2018-02-08	Human	Nigeria
LASV/H.sapiens-wt/NGA/2018/IRR-047	2018-02-05	Human	Nigeria
LASV035-NIG-2009	2009	Human	Nigeria
LASV/H.sapiens-tc/NGA/2012/IRR-003	2012-02-10	Human	Nigeria
LF17013	2017-02-13	Human	Liberia
LM032-SLE-2010	2010	Mouse	Sierra-Leone
Nig14-04	2014	Human	Nigeria
LASV/H.sapiens-wt/NGA/2018/IRR-115	2018-02-21	Human	Nigeria
ISTH2217-NIG-2012	2012	Human	Nigeria
G1727-SLE-2011	2011	Human	Sierra-Leone
LASV/H.sapiens-tc/NGA/2016/IRR-033	2016-03-14	Human	Nigeria
G1200-LIB-2010	2010	Human	Liberia
H.sapiens-wt/NGA/2018/LASV0165-EBONYI-2018	2018-02-10	Human	Nigeria
H.sapiens-wt/NGA/2018/LASV0156-ONDO-2018	2018-02-05	Human	Nigeria
Lassa-virus/H.sapiens-wt/NGA/2016/ISTH-0717	2016-02-23	Human	Nigeria
H.sapiens-wt/NGA/2018/LASV0159-KOGI-2018	2018-02-06	Human	Nigeria
Lassa-virus/H.sapiens-wt/NGA/2016/ISTH-1006	2016-03-24	Human	Nigeria
H.sapiens-wt/NGA/2018/LASV0070-ONDO-2017	2017-02-10	Human	Nigeria
LASV/H.sapiens-wt/NGA/2018/IRR-120	2018-02-25	Human	Nigeria
LASV/H.sapiens-tc/NGA/2016/IRR-021	2016-02-18	Human	Nigeria
H.sapiens-wt/NGA/2018/LASV0093-EDO-2017	2017-08-19	Human	Nigeria
Lassa-virus/H.sapiens-wt/NGA/2016/ISTH-1250	2016-05-18	Human	Nigeria
LASV/H.sapiens-wt/NGA/2018/IRR-001	2018-01-02	Human	Nigeria
LASV989-NIG-2009	2009	Human	Nigeria
LASV274-NIG-2010	2010	Human	Nigeria
H.sapiens-wt/NGA/2018/LASV0096-ONDO-2017	2017-09-18	Human	Nigeria
LASV719-NIG-2009	2009	Human	Nigeria
ISTH1121-NIG-2012	2012	Human	Nigeria
ISTH2050-NIG-2012	2012	Human	Nigeria
LASV251-NIG-2010	2010	Human	Nigeria
803209	1975	Human	Sierra-Leone
LASV003-NIG-2008	2008	Human	Nigeria
LASV/H.sapiens-wt/NGA/2018/IRR-072-I	2018-02-12	Human	Nigeria
LASV/H.sapiens-wt/NGA/2018/IRR-082	2018-02-13	Human	Nigeria
H.sapiens-wt/NGA/2018/LASV0190-ONDO-2018	2018-02-15	Human	Nigeria
H.sapiens-wt/NGA/2018/LASV0076-EDO-2017	2017-03-16	Human	Nigeria
LASV239-NIG-2010	2010	Human	Nigeria
LASV/H.sapiens-tc/NGA/2016/IRR-006	2016-01-14	Human	Nigeria
ISTH1137-NIG-2011	2011	Human	Nigeria
ISTH0531-NIG-2011	2011	Human	Nigeria
LM222-SLE-2010	2010	Mouse	Sierra-Leone
LASV990-NIG-2009	2009	Human	Nigeria
ISTH1064-NIG-2011	2011	Human	Nigeria
807978	1981	Human	Liberia
LASV/H.sapiens-wt/NGA/2018/IRR-100	2018-02-12	Human	Nigeria
LASV263-NIG-2011	2011	Human	Nigeria
Mad39	2014-05-08	Mouse	Guinea
H.sapiens-wt/NGA/2018/LASV0083-ONDO-2017	2017-06-13	Human	Nigeria
LASV221-NIG-2010	2010	Human	Nigeria
LF11011	2011-04-14	Human	Liberia
Nig13-04	2013	Human	Nigeria
G2612-SLE-2012	2012	Human	Sierra-Leone
G2557-SLE-2012	2012	Human	Sierra-Leone
Lassa-virus/H.sapiens-wt/NGA/2016/ISTH-1174	2016-04-29	Human	Nigeria
G2141-SLE-2011	2011	Human	Sierra-Leone
LASV/H.sapiens-wt/NGA/2018/IRR-014	2018-01-15	Human	Nigeria

## Sheet: beast strains 
The dataset information used in this study
strain	collection date	host	isolated country
Macenta	2013-05-26	Mouse	Ghana
H.sapiens-wt/NGA/2018/LASV0095-EDO-2017	2017-09-14	Human	Nigeria
Mad41	2014-05-08	Mouse	Guinea
G3234-SLE-2013	2013	Human	Sierra-Leone
LASV967-NIG-2009	2009	Human	Nigeria
807988	1996	Human	Guinea
LASV/H.sapiens-tc/NGA/2015/IRR-012	2015-11-06	Human	Nigeria
808714	1980	Human	Sierra-Leone
ISTH2129-NIG-2012	2012	Human	Nigeria
G2280-SLE-2012	2012	Human	Sierra-Leone
H.sapiens-wt/NGA/2018/LASV0122-ONDO-2018	2018-01-11	Human	Nigeria
LASV045-NIG-2009	2009	Human	Nigeria
812673	2015	Human	Liberia
LASV/H.sapiens-tc/NGA/2016/IRR-026	2016-02-26	Human	Nigeria
G2197-SLE-2011	2011	Human	Sierra-Leone
H.sapiens-wt/NGA/2018/LASV0068-ONDO-2017	2017-01-26	Human	Nigeria
G2427-SLE-2012	2012	Human	Sierra-Leone
807987	1981	Human	Liberia
LF17020	2017-05-02	Human	Liberia
ISTH2312-NIG-2012	2012	Human	Nigeria
G1442-SLE-2011	2011	Human	Sierra-Leone
LASV/H.sapiens-tc/NGA/2016/IRR-007	2016-01-18	Human	Nigeria
LASV/H.sapiens-tc/NGA/2013/IRR-014	2013-11-23	Human	Nigeria
H.sapiens-wt/NGA/2018/LASV0192.2-ONDO-2018	2018-02-28	Human	Nigeria
LASV/H.sapiens-tc/NGA/2015/IRR-008	2015-04-10	Human	Nigeria
LASV/H.sapiens-wt/NGA/2018/IRR-011	2018-01-13	Human	Nigeria
G2868-SLE-2012	2012	Human	Sierra-Leone
806829	1981	Human	Liberia
LASV/H.sapiens-tc/NGA/2016/IRR-010	2016-01-22	Human	Nigeria
G3151-SLE-2013	2013	Human	Sierra-Leone
LASV245-NIG-2011	2011	Human	Nigeria
LASV/H.sapiens-tc/NGA/2013/IRR-008	2013-03-06	Human	Nigeria
ISTH1069-NIG-2011	2011	Human	Nigeria
LF16016	2016-04-13	Human	Liberia
LASV/H.sapiens-tc/NGA/2016/IRR-003	2016-01-04	Human	Nigeria
Lassa-virus/H.sapiens-wt/NGA/2016/ISTH-1311	2016-06-10	Human	Nigeria
H.sapiens-wt/NGA/2018/LASV0200-UNKNOWN-2018	2018-02-21	Human	Nigeria
LASV242-NIG-2010	2010	Human	Nigeria
H.sapiens-wt/NGA/2018/LASV0214-KOGI-2018	2018-03-18	Human	Nigeria
LF18002	2018-01-10	Human	Liberia
LASV/H.sapiens-wt/NGA/2018/IRR-001-I	2018-01-02	Human	Nigeria
H.sapiens-wt/NGA/2018/LASV0119-EDO-2018	2018-01-09	Human	Nigeria
LASV/H.sapiens-wt/NGA/2018/IRR-121	2018-02-26	Human	Nigeria
Lassa-virus/H.sapiens-wt/NGA/2018/ISTH-0959	2018-02-12	Human	Nigeria
LASV/H.sapiens-wt/NGA/2018/IRR-074	2018-02-12	Human	Nigeria
G2363-SLE-2012	2012	Human	Sierra-Leone
LASV/H.sapiens-wt/NGA/2018/IRR-051	2018-02-06	Human	Nigeria
811606	2010	Human	Liberia
G2147-SLE-2011	2011	Human	Sierra-Leone
LF16004	2016-02-26	Human	Liberia
LF18041	2018-03-03	Human	Liberia
ISTH1038-NIG-2011	2011	Human	Nigeria
ISTH1107-NIG-2012	2012	Human	Nigeria
H.sapiens-wt/NGA/2018/LASV0140-EDO-2018	2018-01-18	Human	Nigeria
Soromba-R	2009-06-01	Mouse	Mali
LF17007	2017-01-09	Human	Liberia
LASV/H.sapiens-tc/NGA/2012/IRR-010	2012-05-28	Human	Nigeria
807876	1981	Human	Nigeria
G2615-SLE-2012	2012	Human	Sierra-Leone
LASV/H.sapiens-tc/NGA/2016/IRR-027	2016-02-28	Human	Nigeria
LASV981-NIG-2009	2009	Human	Nigeria
Nig08-A18	2008	Human	Nigeria
LASV256-NIG-2010	2010	Human	Nigeria
LASV/H.sapiens-tc/NGA/2012/IRR-001	2012-02-08	Human	Nigeria
LASV/H.sapiens-wt/NGA/2018/IRR-033	2018-01-25	Human	Nigeria
810801	1974	Human	Nigeria
Togo/2016/7082	2016-02-26	Human	Togo
Lassa/H.sapiens-wt/TGO/2016/201600568	2016-03-12	Human	Togo
LASV971-NIG-2009	2009	Human	Nigeria
H.sapiens-wt/NGA/2018/LASV0131-ONDO-2018	2018-01-15	Human	Nigeria
H.sapiens-wt/NGA/2018/LASV0217-DELTA-2018	2018-03-27	Human	Nigeria
LASV/H.sapiens-tc/NGA/2016/IRR-020	2016-02-15	Human	Nigeria
KAK-428	2012-03-15	Rodent	Nigeria
LASV063-NIG-2009	2009	Human	Nigeria
LASV/H.sapiens-wt/NGA/2018/IRR-106	2018-02-20	Human	Nigeria
LASV977-NIG-2009	2009	Human	Nigeria
LASV/H.sapiens-wt/NGA/2018/IRR-031	2018-01-24	Human	Nigeria
806593	1989	Human	Nigeria
G1180-SLE-2010	2010	Human	Sierra-Leone
BA366	2003	Mouse	Guinea
G2263-SLE-2012	2012	Human	Sierra-Leone
G2723-SLE-2012	2012	Human	Sierra-Leone
G733-SLE-2010	2010	Human	Sierra-Leone
LASV991-NIG-2009	2009	Human	Nigeria
G2318-SLE-2012	2012	Human	Sierra-Leone
H.sapiens-wt/NGA/2018/LASV0086-EDO-2017	2017-06-25	Human	Nigeria
812285	1976	Human	Nigeria
Mad62	2014-05-09	Mouse	Guinea
H.sapiens-wt/NGA/2018/LASV0145-EDO-2018	2018-01-23	Human	Nigeria
LASV/H.sapiens-wt/NGA/2018/IRR-044	2018-01-30	Human	Nigeria
812337	2014	Human	Liberia
LASV/H.sapiens-wt/NGA/2018/IRR-020	2018-01-17	Human	Nigeria
ONM-700	2012-10-29	Mouse	Nigeria
Nig08-A47	2008	Human	Nigeria
LASV/H.sapiens-tc/NGA/2016/IRR-008	2016-01-20	Human	Nigeria
H.sapiens-wt/NGA/2018/LASV0182-EDO-2018	2018-02-13	Human	Nigeria
G1959-SLE-2011	2011	Human	Sierra-Leone
LF13007	2013-04-29	Human	Liberia
LASV/H.sapiens-wt/NGA/2018/IRR-050	2018-02-05	Human	Nigeria
LASV/H.sapiens-wt/NGA/2018/IRR-009	2018-01-13	Human	Nigeria
LASV/H.sapiens-tc/NGA/2016/IRR-023	2016-02-23	Human	Nigeria
LASV/H.sapiens-wt/NGA/2018/IRR-060	2018-02-03	Human	Nigeria
H.sapiens-wt/NGA/2018/LASV0141-EDO-2018	2018-01-19	Human	Nigeria
H.sapiens-wt/NGA/2018/LASV0073-EDO-2017	2017-03-07	Human	Nigeria
G2903-SLE-2012	2012	Human	Sierra-Leone
LF18037	2018-02-13	Human	Liberia
Lassa-virus/H.sapiens-wt/NGA/2016/ISTH-1610	2016-11-07	Human	Nigeria
LF18042	2018-03-01	Human	Liberia
LASV267-NIG-2010	2010	Human	Nigeria
G503-SLE-2009	2009	Human	Sierra-Leone
LASV/H.sapiens-wt/NGA/2018/IRR-066	2018-02-10	Human	Nigeria
ISTH0595-NIG-2011	2011	Human	Nigeria
ISTH2061-NIG-2012	2012	Human	Nigeria
G2184-SLE-2011	2011	Human	Sierra-Leone
H.sapiens-wt/NGA/2018/LASV0079-EDO-2017	2017-05-15	Human	Nigeria
Bamba-R114	2012-03-01	Mouse	Mali
LASV/H.sapiens-wt/NGA/2018/IRR-119-I	2018-02-25	Human	Nigeria
H.sapiens-wt/NGA/2018/LASV0154-TARABA-2018	2018-02-04	Human	Nigeria
H.sapiens-wt/NGA/2018/LASV0098-EDO-2017	2017-10-16	Human	Nigeria
G2431-SLE-2012	2012	Human	Sierra-Leone
Nig08-A19	2008	Human	Nigeria
H.sapiens-wt/NGA/2018/LASV0118-EDO-2018	2018-01-09	Human	Nigeria
LASV250-NIG-2011	2011	Human	Nigeria
G808-SLE-2010	2010	Human	Sierra-Leone
LASV/H.sapiens-tc/NGA/2013/IRR-016	2013-12-08	Human	Nigeria
Lassa-virus/H.sapiens-wt/NGA/2016/ISTH-0017	2016-01-04	Human	Nigeria
G1618-SLE-2011	2011	Human	Sierra-Leone
H.sapiens-wt/NGA/2018/LASV0092-EDO-2017	2017-08-04	Human	Nigeria
LASV/H.sapiens-wt/NGA/2018/IRR-022	2018-01-17	Human	Nigeria
LASV966-NIG-2009	2009	Human	Nigeria
H.sapiens-wt/NGA/2018/LASV0147-EDO-2018	2018-01-26	Human	Nigeria
LASV/H.sapiens-tc/NGA/2016/IRR-018	2016-02-09	Human	Nigeria
H.sapiens-wt/NGA/LASV-SM3	2014	Human	Nigeria
LASV/H.sapiens-tc/NGA/2016/IRR-025	2016-02-26	Human	Nigeria
LASV/H.sapiens-wt/NGA/2018/IRR-047	2018-02-05	Human	Nigeria
LASV/H.sapiens-tc/NGA/2012/IRR-003	2012-02-10	Human	Nigeria
G1200-LIB-2010	2010	Human	Liberia
LASV/H.sapiens-tc/NGA/2016/IRR-021	2016-02-18	Human	Nigeria
LASV989-NIG-2009	2009	Human	Nigeria
LASV251-NIG-2010	2010	Human	Nigeria
803209	1975	Human	Sierra-Leone
LASV/H.sapiens-wt/NGA/2018/IRR-072-I	2018-02-12	Human	Nigeria
LASV/H.sapiens-tc/NGA/2016/IRR-006	2016-01-14	Human	Nigeria
807978	1981	Human	Liberia
G2141-SLE-2011	2011	Human	Sierra-Leone
MK656401	LASV_3523	L	2015_08_24	Mouse	Cote_dIvoire
MK656396	LASV_R132	L	2013_08_22	Mouse	Cote_dIvoire
BEN_14_26530	2014_10_23	Human	Benin
BEN_16069	2016_02_23	Human	Benin
BEN_16070	2016_01_29	Human	Benin
BEN_16071	2016_02_07	Human	Benin

## Sheet: GPC variation strains
The dataset information used in this study
accession	strains	segemnt	collection data	host	isolated country
KM822128	Pinneo NIG 1969	S	1969	Human	Nigeria
AF181853	LP	S	NA	Human	Nigeria
AY628208	Acar 3080	S	NA	Human	Nigeria
AY628207	Pinneo	S	NA	Human	Nigeria
MG812675	812285	S	1976	Human	Nigeria
MH887793	H.sapiens wt/NGA/2018/LASV0065 ONDO 2017	S	2017 01 09	Human	Nigeria
MH887881	H.sapiens wt/NGA/2018/LASV0066 EDO 2017	S	2017 01 21	Human	Nigeria
MH887827	H.sapiens wt/NGA/2018/LASV0067 EDO 2017	S	2017 01 24	Human	Nigeria
MH887888	H.sapiens wt/NGA/2018/LASV0068 ONDO 2017	S	2017 01 26	Human	Nigeria
MH887831	H.sapiens wt/NGA/2018/LASV0069 EDO 2017	S	2017 02 07	Human	Nigeria
MH887885	H.sapiens wt/NGA/2018/LASV0070 ONDO 2017	S	2017 02 10	Human	Nigeria
MH887822	H.sapiens wt/NGA/2018/LASV0071 EDO 2017	S	2017 02 14	Human	Nigeria
MH887877	H.sapiens wt/NGA/2018/LASV0072 ONDO 2017	S	2017 02 14	Human	Nigeria
MH887817	H.sapiens wt/NGA/2018/LASV0073 EDO 2017	S	2017 03 07	Human	Nigeria
MH887874	H.sapiens wt/NGA/2018/LASV0074 EDO 2017	S	2017 03 12	Human	Nigeria
MH887763	H.sapiens wt/NGA/2018/LASV0075 EDO 2017	S	2017 03 15	Human	Nigeria
MH887783	H.sapiens wt/NGA/2018/LASV0076 EDO 2017	S	2017 03 16	Human	Nigeria
MH887897	H.sapiens wt/NGA/2018/LASV0077 EDO 2017	S	2017 04 17	Human	Nigeria
MH887883	H.sapiens wt/NGA/2018/LASV0080 ONDO 2017	S	2017 05 16	Human	Nigeria
MH887787	H.sapiens wt/NGA/2018/LASV0081 EDO 2017	S	2017 06 05	Human	Nigeria
MH887800	H.sapiens wt/NGA/2018/LASV0082 EDO 2017	S	2017 06 07	Human	Nigeria
MH887801	H.sapiens wt/NGA/2018/LASV0083 ONDO 2017	S	2017 06 13	Human	Nigeria
MH887811	H.sapiens wt/NGA/2018/LASV0084 EDO 2017	S	2017 06 16	Human	Nigeria
MH887826	H.sapiens wt/NGA/2018/LASV0085 EDO 2017	S	2017 06 17	Human	Nigeria
MH887838	H.sapiens wt/NGA/2018/LASV0086 EDO 2017	S	2017 06 25	Human	Nigeria
MH887808	H.sapiens wt/NGA/2018/LASV0088 EDO 2017	S	2017 06 27	Human	Nigeria
MH887844	H.sapiens wt/NGA/2018/LASV0089 ONDO 2017	S	2017 07 05	Human	Nigeria
MH887789	H.sapiens wt/NGA/2018/LASV0090 ONDO 2017	S	2017 07 19	Human	Nigeria
MH887841	H.sapiens wt/NGA/2018/LASV0091 EDO 2017	S	2017 08 03	Human	Nigeria
MH887840	H.sapiens wt/NGA/2018/LASV0092 EDO 2017	S	2017 08 04	Human	Nigeria
MH887761	H.sapiens wt/NGA/2018/LASV0093 EDO 2017	S	2017 08 19	Human	Nigeria
MH887830	H.sapiens wt/NGA/2018/LASV0094 KOGI 2017	S	2017 09 02	Human	Nigeria
MH887854	H.sapiens wt/NGA/2018/LASV0095 EDO 2017	S	2017 09 14	Human	Nigeria
MH887884	H.sapiens wt/NGA/2018/LASV0098 EDO 2017	S	2017 10 16	Human	Nigeria
MH887896	H.sapiens wt/NGA/2018/LASV0099 EDO 2017	S	2017 10 17	Human	Nigeria
MH887823	H.sapiens wt/NGA/2018/LASV0100 EDO 2017	S	2017 10 18	Human	Nigeria
MH887772	H.sapiens wt/NGA/2018/LASV0101 EDO 2017	S	2017 11 10	Human	Nigeria
MH887835	H.sapiens wt/NGA/2018/LASV0102 ONDO 2017	S	2017 11 26	Human	Nigeria
MH887797	H.sapiens wt/NGA/2018/LASV0103 EDO 2017	S	2017 11 29	Human	Nigeria
MH887849	H.sapiens wt/NGA/2018/LASV0104 ONDO 2017	S	2017 12 12	Human	Nigeria
MH887757	H.sapiens wt/NGA/2018/LASV0105 ONDO 2017	S	2017 12 17	Human	Nigeria
MH887791	H.sapiens wt/NGA/2018/LASV0106 ONDO 2017	S	2017 12 17	Human	Nigeria
MH887788	H.sapiens wt/NGA/2018/LASV0107 ONDO 2017	S	2017 12 17	Human	Nigeria
MH887848	H.sapiens wt/NGA/2018/LASV0108 ONDO 2017	S	2017 12 17	Human	Nigeria
MH887773	H.sapiens wt/NGA/2018/LASV0109 ONDO 2017	S	2017 12 18	Human	Nigeria
MH887872	H.sapiens wt/NGA/2018/LASV0110 ONDO 2017	S	2017 12 26	Human	Nigeria
MH887843	H.sapiens wt/NGA/2018/LASV0111 ONDO 2017	S	2017 12 28	Human	Nigeria
MH887795	H.sapiens wt/NGA/2018/LASV0112 ONDO 2017	S	2017 12 29	Human	Nigeria
MH887805	H.sapiens wt/NGA/2018/LASV0117 ONDO 2018	S	2018 01 07	Human	Nigeria
MH887833	H.sapiens wt/NGA/2018/LASV0118 EDO 2018	S	2018 01 09	Human	Nigeria
MH887770	H.sapiens wt/NGA/2018/LASV0119 EDO 2018	S	2018 01 09	Human	Nigeria
MH887790	H.sapiens wt/NGA/2018/LASV0120 ONDO 2018	S	2018 01 11	Human	Nigeria
MH887892	H.sapiens wt/NGA/2018/LASV0121 ONDO 2018	S	2018 01 11	Human	Nigeria
MH887846	H.sapiens wt/NGA/2018/LASV0122 ONDO 2018	S	2018 01 11	Human	Nigeria
MH887837	H.sapiens wt/NGA/2018/LASV0125 EBONYI 2018	S	2018 01 13	Human	Nigeria
MH887820	H.sapiens wt/NGA/2018/LASV0126 EBONYI 2018	S	2018 01 13	Human	Nigeria
MH887860	H.sapiens wt/NGA/2018/LASV0127 EBONYI 2018	S	2018 01 13	Human	Nigeria
MH887781	H.sapiens wt/NGA/2018/LASV0128 ONDO 2018	S	2018 01 14	Human	Nigeria
MH887766	H.sapiens wt/NGA/2018/LASV0129 ONDO 2018	S	2018 01 13	Human	Nigeria
MH887816	H.sapiens wt/NGA/2018/LASV0130 EDO 2018	S	2018 01 15	Human	Nigeria
MH887875	H.sapiens wt/NGA/2018/LASV0131 ONDO 2018	S	2018 01 15	Human	Nigeria
MH887891	H.sapiens wt/NGA/2018/LASV0134 EDO 2018	S	2018 01 17	Human	Nigeria
MH887865	H.sapiens wt/NGA/2018/LASV0135 ONDO 2018	S	2018 01 17	Human	Nigeria
MH887868	H.sapiens wt/NGA/2018/LASV0136 ONDO 2018	S	2018 01 17	Human	Nigeria
MH887866	H.sapiens wt/NGA/2018/LASV0137 ONDO 2018	S	2018 01 17	Human	Nigeria
MH887765	H.sapiens wt/NGA/2018/LASV0138 KOGI 2018	S	2018 01 17	Human	Nigeria
MH887879	H.sapiens wt/NGA/2018/LASV0139 NASARAWA 2018	S	2018 01 18	Human	Nigeria
MH887819	H.sapiens wt/NGA/2018/LASV0140 EDO 2018	S	2018 01 18	Human	Nigeria
MH887786	H.sapiens wt/NGA/2018/LASV0141 EDO 2018	S	2018 01 19	Human	Nigeria
MH887771	H.sapiens wt/NGA/2018/LASV0147 EDO 2018	S	2018 01 26	Human	Nigeria
MH887784	H.sapiens wt/NGA/2018/LASV0148 UNKNOWN 2018	S	2018 01 28	Human	Nigeria
MH887810	H.sapiens wt/NGA/2018/LASV0149 KOGI 2018	S	2018 01 30	Human	Nigeria
MH887756	H.sapiens wt/NGA/2018/LASV0151 EDO 2018	S	2018 02 02	Human	Nigeria
MH887876	H.sapiens wt/NGA/2018/LASV0153 EDO 2018	S	2018 02 04	Human	Nigeria
MH887880	H.sapiens wt/NGA/2018/LASV0154 TARABA 2018	S	2018 02 04	Human	Nigeria
MH887887	H.sapiens wt/NGA/2018/LASV0155 EDO 2018	S	2018 02 05	Human	Nigeria
MH887779	H.sapiens wt/NGA/2018/LASV0155.2 EDO 2018	S	2018 02 16	Human	Nigeria
MH887775	H.sapiens wt/NGA/2018/LASV0156 ONDO 2018	S	2018 02 05	Human	Nigeria
MH887796	H.sapiens wt/NGA/2018/LASV0160 KOGI 2018	S	2018 02 06	Human	Nigeria
MH887867	H.sapiens wt/NGA/2018/LASV0162 ONDO 2018	S	2018 02 09	Human	Nigeria
MH887855	H.sapiens wt/NGA/2018/LASV0163 ONDO 2018	S	2018 02 09	Human	Nigeria
MH887821	H.sapiens wt/NGA/2018/LASV0164 ONDO 2018	S	2018 02 09	Human	Nigeria
MH887799	H.sapiens wt/NGA/2018/LASV0165 EBONYI 2018	S	2018 02 10	Human	Nigeria
MH887873	H.sapiens wt/NGA/2018/LASV0166 ONDO 2018	S	2018 02 10	Human	Nigeria
MH887858	H.sapiens wt/NGA/2018/LASV0167 ONDO 2018	S	2018 02 10	Human	Nigeria
MH887834	H.sapiens wt/NGA/2018/LASV0168 DELTA 2018	S	2018 02 10	Human	Nigeria
MH887807	H.sapiens wt/NGA/2018/LASV0173 EDO 2018	S	2018 02 12	Human	Nigeria
MH887806	H.sapiens wt/NGA/2018/LASV0188 ONDO 2018	S	2018 02 14	Human	Nigeria
MH887845	H.sapiens wt/NGA/2018/LASV0190 ONDO 2018	S	2018 02 15	Human	Nigeria
MH887774	H.sapiens wt/NGA/2018/LASV0191 ONDO 2018	S	2018 02 15	Human	Nigeria
MH887768	H.sapiens wt/NGA/2018/LASV0192 ONDO 2018	S	2018 02 16	Human	Nigeria
MH887802	H.sapiens wt/NGA/2018/LASV0192.2 ONDO 2018	S	2018 02 28	Human	Nigeria
MH887889	H.sapiens wt/NGA/2018/LASV0193 DELTA 2018	S	2018 02 17	Human	Nigeria
MH887769	H.sapiens wt/NGA/2018/LASV0193.2 DELTA 2018	S	2018 02 21	Human	Nigeria
MH887755	H.sapiens wt/NGA/2018/LASV0194 EDO 2018	S	2018 02 17	Human	Nigeria
MH887828	H.sapiens wt/NGA/2018/LASV0195 EBONYI 2018	S	2018 02 17	Human	Nigeria
MH887893	H.sapiens wt/NGA/2018/LASV0198 EDO 2018	S	2018 02 20	Human	Nigeria
MH887813	H.sapiens wt/NGA/2018/LASV0199 EDO 2018	S	2018 02 20	Human	Nigeria
MH887894	H.sapiens wt/NGA/2018/LASV0200 UNKNOWN 2018	S	2018 02 21	Human	Nigeria
MH887839	H.sapiens wt/NGA/2018/LASV0201 ONDO 2018	S	2018 02 21	Human	Nigeria
MH887824	H.sapiens wt/NGA/2018/LASV0202 EDO 2018	S	2018 02 22	Human	Nigeria
MH887861	H.sapiens wt/NGA/2018/LASV0206 EDO 2018	S	2018 02 25	Human	Nigeria
MH887803	H.sapiens wt/NGA/2018/LASV0207 ONDO 2018	S	2018 02 28	Human	Nigeria
MH887759	H.sapiens wt/NGA/2018/LASV0208 EDO 2018	S	2018 03 01	Human	Nigeria
MH887785	H.sapiens wt/NGA/2018/LASV0209 KOGI 2018	S	2018 03 02	Human	Nigeria
MH887847	H.sapiens wt/NGA/2018/LASV0210 EDO 2018	S	2018 03 03	Human	Nigeria
MH887886	H.sapiens wt/NGA/2018/LASV0213 EDO 2018	S	2018 03 16	Human	Nigeria
MH887825	H.sapiens wt/NGA/2018/LASV0214 KOGI 2018	S	2018 03 18	Human	Nigeria
MK291249	H.sapiens wt/NGA/LASV SM2	S	2014	Human	Nigeria
MK291250	H.sapiens wt/NGA/LASV SM3	S	2014	Human	Nigeria
KM821912	ISTH0009 NIG 2011	S	2011	Human	Nigeria
KM821914	ISTH0012 NIG 2011	S	2011	Human	Nigeria
KM821916	ISTH0047 NIG 2011	S	2011	Human	Nigeria
KM821918	ISTH0073 NIG 2011	S	2011	Human	Nigeria
KM821920	ISTH0230 NIG 2011	S	2011	Human	Nigeria
KM821922	ISTH0531 NIG 2011	S	2011	Human	Nigeria
KM821924	ISTH0595 NIG 2011	S	2011	Human	Nigeria
KM821925	ISTH0964 NIG 2011	S	2011	Human	Nigeria
KM821927	ISTH1003 NIG 2011	S	2011	Human	Nigeria
KM821929	ISTH1038 NIG 2011	S	2011	Human	Nigeria
KM821941	ISTH1107 NIG 2012	S	2012	Human	Nigeria
KM821943	ISTH1111 NIG 2011	S	2011	Human	Nigeria
KM821945	ISTH1121 NIG 2012	S	2012	Human	Nigeria
KM821947	ISTH1129 NIG 2012	S	2012	Human	Nigeria
KM821949	ISTH1137 NIG 2011	S	2011	Human	Nigeria
KM821951	ISTH2010 NIG 2012	S	2012	Human	Nigeria
KM821953	ISTH2016 NIG 2012	S	2012	Human	Nigeria
KM821955	ISTH2020 NIG 2012	S	2012	Human	Nigeria
KM821957	ISTH2025 NIG 2012	S	2012	Human	Nigeria
KM821959	ISTH2031 NIG 2012	S	2012	Human	Nigeria
KM821961	ISTH2037 NIG 2012	S	2012	Human	Nigeria
KM821963	ISTH2042 NIG 2012	S	2012	Human	Nigeria
KM821965	ISTH2046 NIG 2012	S	2012	Human	Nigeria
KM821967	ISTH2050 NIG 2012	S	2012	Human	Nigeria
KM821969	ISTH2057 NIG 2012	S	2012	Human	Nigeria
KM821971	ISTH2061 NIG 2012	S	2012	Human	Nigeria
KM821972	ISTH2064 NIG 2012	S	2012	Human	Nigeria
KM821974	ISTH2065 NIG 2012	S	2012	Human	Nigeria
KM821976	ISTH2066 NIG 2012	S	2012	Human	Nigeria
KM821977	ISTH2069 NIG 2012	S	2012	Human	Nigeria
KM821979	ISTH2094 NIG 2012	S	2012	Human	Nigeria
KM821982	ISTH2129 NIG 2012	S	2012	Human	Nigeria
KM821984	ISTH2217 NIG 2012	S	2012	Human	Nigeria
KM821986	ISTH2271 NIG 2012	S	2012	Human	Nigeria
KM821988	ISTH2304 NIG 2012	S	2012	Human	Nigeria
KM821990	ISTH2312 NIG 2012	S	2012	Human	Nigeria
KM821992	ISTH2316 NIG 2012	S	2012	Human	Nigeria
KM821994	ISTH2334 NIG 2012	S	2012	Human	Nigeria
KM821996	ISTH2358 NIG 2012	S	2012	Human	Nigeria
KM821998	ISTH2376 NIG 2012	S	2012	Human	Nigeria
MH053573	Lassa virus/H.sapiens wt/NGA/2015/ISTH 0543	S	2015 09 14	Human	Nigeria
MH053513	Lassa virus/H.sapiens wt/NGA/2015/ISTH 0547	S	2015 09 14	Human	Nigeria
MH053586	Lassa virus/H.sapiens wt/NGA/2015/ISTH 0574	S	2015 09 16	Human	Nigeria
MH053553	Lassa virus/H.sapiens wt/NGA/2015/ISTH 0681	S	2015 11 06	Human	Nigeria
MH053559	Lassa virus/H.sapiens wt/NGA/2015/ISTH 0682	S	2015 11 06	Human	Nigeria
MH053511	Lassa virus/H.sapiens wt/NGA/2015/ISTH 0687	S	2015 11 10	Human	Nigeria
MH053498	Lassa virus/H.sapiens wt/NGA/2015/ISTH 0736	S	2015 11 27	Human	Nigeria
MH053574	Lassa virus/H.sapiens wt/NGA/2015/ISTH 0821	S	2015 12 27	Human	Nigeria
MH053562	Lassa virus/H.sapiens wt/NGA/2016/ISTH 0104	S	2016 01 05	Human	Nigeria
MH053567	Lassa virus/H.sapiens wt/NGA/2016/ISTH 0133	S	2016 01 14	Human	Nigeria
MH053578	Lassa virus/H.sapiens wt/NGA/2016/ISTH 0141	S	2016 01 14	Human	Nigeria
MH053564	Lassa virus/H.sapiens wt/NGA/2016/ISTH 0146	S	2016 01 15	Human	Nigeria
MH053493	Lassa virus/H.sapiens wt/NGA/2016/ISTH 0176	S	2016 01 17	Human	Nigeria
MH053582	Lassa virus/H.sapiens wt/NGA/2016/ISTH 0199	S	2016 01 18	Human	Nigeria
MH053490	Lassa virus/H.sapiens wt/NGA/2016/ISTH 0314	S	2016 01 23	Human	Nigeria
MH053485	Lassa virus/H.sapiens wt/NGA/2016/ISTH 0447	S	2016 02 02	Human	Nigeria
MH053527	Lassa virus/H.sapiens wt/NGA/2016/ISTH 0543	S	2016 02 08	Human	Nigeria
MH053572	Lassa virus/H.sapiens wt/NGA/2016/ISTH 0565	S	2016 02 11	Human	Nigeria
MH053545	Lassa virus/H.sapiens wt/NGA/2016/ISTH 0572	S	2016 02 11	Human	Nigeria
MH053514	Lassa virus/H.sapiens wt/NGA/2016/ISTH 0610	S	2016 02 15	Human	Nigeria
MH053561	Lassa virus/H.sapiens wt/NGA/2016/ISTH 0701	S	2016 02 23	Human	Nigeria
MH053484	Lassa virus/H.sapiens wt/NGA/2016/ISTH 0702	S	2016 02 23	Human	Nigeria
MH053528	Lassa virus/H.sapiens wt/NGA/2016/ISTH 0703	S	2016 02 24	Human	Nigeria
MH053544	Lassa virus/H.sapiens wt/NGA/2016/ISTH 0753	S	2016 02 28	Human	Nigeria
MH053526	Lassa virus/H.sapiens wt/NGA/2016/ISTH 0759	S	2016 02 28	Human	Nigeria
MH053552	Lassa virus/H.sapiens wt/NGA/2016/ISTH 0777	S	2016 02 28	Human	Nigeria
MH053584	Lassa virus/H.sapiens wt/NGA/2016/ISTH 0779	S	2016 02 29	Human	Nigeria
MH053588	Lassa virus/H.sapiens wt/NGA/2016/ISTH 0919	S	2016 03 16	Human	Nigeria
MH053575	Lassa virus/H.sapiens wt/NGA/2016/ISTH 1006	S	2016 03 24	Human	Nigeria
MH053522	Lassa virus/H.sapiens wt/NGA/2016/ISTH 1026	S	2016 04 04	Human	Nigeria
MH053533	Lassa virus/H.sapiens wt/NGA/2016/ISTH 1069	S	2016 04 13	Human	Nigeria
MH053580	Lassa virus/H.sapiens wt/NGA/2016/ISTH 1070	S	2016 04 13	Human	Nigeria
MH053576	Lassa virus/H.sapiens wt/NGA/2016/ISTH 1123	S	2016 04 21	Human	Nigeria
MH053560	Lassa virus/H.sapiens wt/NGA/2016/ISTH 1150	S	2016 04 25	Human	Nigeria
MH053483	Lassa virus/H.sapiens wt/NGA/2016/ISTH 1174	S	2016 04 29	Human	Nigeria
MH053531	Lassa virus/H.sapiens wt/NGA/2016/ISTH 1207	S	2016 05 03	Human	Nigeria
MH053488	Lassa virus/H.sapiens wt/NGA/2016/ISTH 1250	S	2016 05 18	Human	Nigeria
MH053557	Lassa virus/H.sapiens wt/NGA/2016/ISTH 1306	S	2016 06 08	Human	Nigeria
MH053487	Lassa virus/H.sapiens wt/NGA/2016/ISTH 1568	S	2016 10 27	Human	Nigeria
MH053577	Lassa virus/H.sapiens wt/NGA/2016/ISTH 1591	S	2016 11 02	Human	Nigeria
MH053536	Lassa virus/H.sapiens wt/NGA/2016/ISTH 1610	S	2016 11 07	Human	Nigeria
MH157046	Lassa virus/H.sapiens wt/NGA/2018/ISTH 0026	S	2018 01 07	Human	Nigeria
MH157035	Lassa virus/H.sapiens wt/NGA/2018/ISTH 0097	S	2018 01 15	Human	Nigeria
MH157044	Lassa virus/H.sapiens wt/NGA/2018/ISTH 0541	S	2018 01 02	Human	Nigeria
MH157039	Lassa virus/H.sapiens wt/NGA/2018/ISTH 0611	S	2018 02 02	Human	Nigeria
MH157028	Lassa virus/H.sapiens wt/NGA/2018/ISTH 0664	S	2018 02 04	Human	Nigeria
MH157041	Lassa virus/H.sapiens wt/NGA/2018/ISTH 1381	S	2018 02 23	Human	Nigeria
MH157050	Lassa virus/H.sapiens wt/NGA/2018/ISTH 1643	S	2018 03 05	Human	Nigeria
MT861994	LASV/GUI/KIS 2019	S	2019 01 28	Human	Guinea
MK107897	LASV/H.sapiens tc/NGA/2011/IRR 001	S	2011 08 02	Human	Nigeria
MK107958	LASV/H.sapiens tc/NGA/2012/IRR 001	S	2012 02 08	Human	Nigeria
MK107966	LASV/H.sapiens tc/NGA/2012/IRR 004	S	2012 02 10	Human	Nigeria
MK107969	LASV/H.sapiens tc/NGA/2012/IRR 005	S	2012 02 10	Human	Nigeria
MK107967	LASV/H.sapiens tc/NGA/2012/IRR 006	S	2012 02 21	Human	Nigeria
MK107963	LASV/H.sapiens tc/NGA/2013/IRR 001	S	2013 01 16	Human	Nigeria
MK107970	LASV/H.sapiens tc/NGA/2013/IRR 004	S	2013 01 23	Human	Nigeria
MK107961	LASV/H.sapiens tc/NGA/2013/IRR 005	S	2013 01 25	Human	Nigeria
MK107964	LASV/H.sapiens tc/NGA/2013/IRR 006	S	2013 01 30	Human	Nigeria
MK107901	LASV/H.sapiens tc/NGA/2013/IRR 008	S	2013 03 06	Human	Nigeria
MK107962	LASV/H.sapiens tc/NGA/2013/IRR 007	S	2013 02 03	Human	Nigeria
MK107948	LASV/H.sapiens tc/NGA/2014/IRR 004	S	2014 05 08	Human	Nigeria
MK107902	LASV/H.sapiens tc/NGA/2014/IRR 005	S	2014 05 14	Human	Nigeria
MK107903	LASV/H.sapiens tc/NGA/2014/IRR 006	S	2014 05 14	Human	Nigeria
MK107904	LASV/H.sapiens tc/NGA/2014/IRR 007	S	2014 05 14	Human	Nigeria
MK107905	LASV/H.sapiens tc/NGA/2014/IRR 008	S	2014 05 15	Human	Nigeria
MK107906	LASV/H.sapiens tc/NGA/2014/IRR 009	S	2014 05 17	Human	Nigeria
MK107907	LASV/H.sapiens tc/NGA/2014/IRR 010	S	2014 05 17	Human	Nigeria
MK107908	LASV/H.sapiens tc/NGA/2014/IRR 011	S	2014 08 01	Human	Nigeria
MK107909	LASV/H.sapiens tc/NGA/2014/IRR 012	S	2014 08 10	Human	Nigeria
MK107950	LASV/H.sapiens tc/NGA/2015/IRR 006	S	2015 02 22	Human	Nigeria
MK107952	LASV/H.sapiens tc/NGA/2015/IRR 007	S	2015 02 25	Human	Nigeria
MK107913	LASV/H.sapiens tc/NGA/2015/IRR 010	S	2015 07 02	Human	Nigeria
MK107915	LASV/H.sapiens tc/NGA/2015/IRR 011	S	2015 09 16	Human	Nigeria
MK107916	LASV/H.sapiens tc/NGA/2015/IRR 012	S	2015 11 06	Human	Nigeria
MK107942	LASV/H.sapiens tc/NGA/2016/IRR 004	S	2016 01 05	Human	Nigeria
MK107922	LASV/H.sapiens tc/NGA/2016/IRR 007	S	2016 01 18	Human	Nigeria
MK107941	LASV/H.sapiens tc/NGA/2016/IRR 010	S	2016 01 22	Human	Nigeria
MK107928	LASV/H.sapiens tc/NGA/2016/IRR 013	S	2016 01 27	Human	Nigeria
MK107936	LASV/H.sapiens tc/NGA/2016/IRR 017	S	2016 02 06	Human	Nigeria
GU481068	Nig08 04	S	2008	Human	Nigeria
GU481074	Nig08 A37	S	2008	Human	Nigeria
GU481076	Nig08 A41	S	2008	Human	Nigeria
GU481078	Nig08 A47	S	2008	Human	Nigeria
LC387468	Nig12 17	S	2012	Human	Nigeria
LC387470	Nig13 04	S	2013	Human	Nigeria
LC387472	Nig14 03	S	2014	Human	Nigeria
LC387474	Nig14 04	S	2014	Human	Nigeria
LC387476	Nig14 06	S	2014	Human	Nigeria
LC387478	Nig14 09	S	2014	Human	Nigeria
LC387480	Nig14 19	S	2014	Human	Nigeria
LC387482	Nig16 02	S	2016	Human	Nigeria
LC388592	Nig16 10	S	2016	Human	Nigeria
LC387484	Nig16 11	S	2016	Human	Nigeria
LC387486	Nig16 13	S	2016	Human	Nigeria
LC387488	Nig16 14	S	2016	Human	Nigeria
MK107923	LASV/H.sapiens tc/NGA/2016/IRR 018	S	2016 02 09	Human	Nigeria
MK107924	LASV/H.sapiens tc/NGA/2016/IRR 021	S	2016 02 18	Human	Nigeria
MK107955	LASV/H.sapiens tc/NGA/2016/IRR 022	S	2016 02 20	Human	Nigeria
MK107956	LASV/H.sapiens tc/NGA/2016/IRR 024	S	2016 02 24	Human	Nigeria
MK107925	LASV/H.sapiens tc/NGA/2016/IRR 026	S	2016 02 26	Human	Nigeria
MK107926	LASV/H.sapiens tc/NGA/2016/IRR 027	S	2016 02 28	Human	Nigeria
MK107938	LASV/H.sapiens tc/NGA/2016/IRR 029	S	2016 03 01	Human	Nigeria
MK107957	LASV/H.sapiens tc/NGA/2016/IRR 030	S	2016 03 01	Human	Nigeria
MK107937	LASV/H.sapiens tc/NGA/2016/IRR 033	S	2016 03 14	Human	Nigeria
MK107943	LASV/H.sapiens tc/NGA/2017/IRR 015	S	2017	Human	Nigeria
MK107944	LASV/H.sapiens tc/NGA/2017/IRR 016	S	2017	Human	Nigeria
MK107946	LASV/H.sapiens wt/NGA/2013/IRR 011	S	2013 03 18	Human	Nigeria
MK117846	LASV/H.sapiens wt/NGA/2014/IRR 001	S	2014 01 25	Human	Nigeria
MK107951	LASV/H.sapiens wt/NGA/2015/IRR 001	S	2015 01 08	Human	Nigeria
MK117847	LASV/H.sapiens wt/NGA/2016/IRR 001	S	2016 01 04	Human	Nigeria
MK117851	LASV/H.sapiens wt/NGA/2017/IRR 004	S	2017	Human	Nigeria
MK117948	LASV/H.sapiens wt/NGA/2017/IRR 005	S	2017 01 16	Human	Nigeria
MK117949	LASV/H.sapiens wt/NGA/2017/IRR 006	S	2017 01 19	Human	Nigeria
MK117954	LASV/H.sapiens wt/NGA/2018/IRR 003	S	2018 01 07	Human	Nigeria
MK117955	LASV/H.sapiens wt/NGA/2018/IRR 005	S	2018 01 09	Human	Nigeria
MK117956	LASV/H.sapiens wt/NGA/2018/IRR 006	S	2018 01 09	Human	Nigeria
MK117957	LASV/H.sapiens wt/NGA/2018/IRR 008	S	2018 01 11	Human	Nigeria
MK117958	LASV/H.sapiens wt/NGA/2018/IRR 009	S	2018 01 13	Human	Nigeria
MK117959	LASV/H.sapiens wt/NGA/2018/IRR 010	S	2018 01 12	Human	Nigeria
MK117960	LASV/H.sapiens wt/NGA/2018/IRR 011	S	2018 01 13	Human	Nigeria
MK117961	LASV/H.sapiens wt/NGA/2018/IRR 013	S	2018 01 13	Human	Nigeria
MK117853	LASV/H.sapiens wt/NGA/2018/IRR 013 I	S	2018 01 13	Human	Nigeria
MK117962	LASV/H.sapiens wt/NGA/2018/IRR 014	S	2018 01 15	Human	Nigeria
MK117854	LASV/H.sapiens wt/NGA/2018/IRR 014 I	S	2018 01 15	Human	Nigeria
MK117963	LASV/H.sapiens wt/NGA/2018/IRR 015	S	2018 01 16	Human	Nigeria
MK117964	LASV/H.sapiens wt/NGA/2018/IRR 017	S	2018 01 15	Human	Nigeria
MK117965	LASV/H.sapiens wt/NGA/2018/IRR 019	S	2018 01 17	Human	Nigeria
MK117966	LASV/H.sapiens wt/NGA/2018/IRR 020	S	2018 01 17	Human	Nigeria
MK117967	LASV/H.sapiens wt/NGA/2018/IRR 021	S	2018 01 18	Human	Nigeria
MK117855	LASV/H.sapiens wt/NGA/2018/IRR 021 I	S	2018 01 18	Human	Nigeria
MK117968	LASV/H.sapiens wt/NGA/2018/IRR 022	S	2018 01 17	Human	Nigeria
MK117969	LASV/H.sapiens wt/NGA/2018/IRR 023	S	2018 01 18	Human	Nigeria
MK117972	LASV/H.sapiens wt/NGA/2018/IRR 031	S	2018 01 24	Human	Nigeria
MK117973	LASV/H.sapiens wt/NGA/2018/IRR 033	S	2018 01 25	Human	Nigeria
MK117974	LASV/H.sapiens wt/NGA/2018/IRR 034	S	2018 01 25	Human	Nigeria
MK117975	LASV/H.sapiens wt/NGA/2018/IRR 035	S	2018 01 23	Human	Nigeria
MK117976	LASV/H.sapiens wt/NGA/2018/IRR 036	S	2018 01 26	Human	Nigeria
MK117977	LASV/H.sapiens wt/NGA/2018/IRR 037	S	2018 01 26	Human	Nigeria
MK117982	LASV/H.sapiens wt/NGA/2018/IRR 046	S	2018 02 05	Human	Nigeria
MK117983	LASV/H.sapiens wt/NGA/2018/IRR 047	S	2018 02 05	Human	Nigeria
MK117984	LASV/H.sapiens wt/NGA/2018/IRR 048	S	2018 02 04	Human	Nigeria
MK117985	LASV/H.sapiens wt/NGA/2018/IRR 050	S	2018 02 05	Human	Nigeria
MK117986	LASV/H.sapiens wt/NGA/2018/IRR 051	S	2018 02 06	Human	Nigeria
MK117987	LASV/H.sapiens wt/NGA/2018/IRR 052	S	2018 02 07	Human	Nigeria
MK117988	LASV/H.sapiens wt/NGA/2018/IRR 053	S	2018 02 08	Human	Nigeria
MK117990	LASV/H.sapiens wt/NGA/2018/IRR 056	S	2018 02 09	Human	Nigeria
MK117991	LASV/H.sapiens wt/NGA/2018/IRR 057	S	2018 02 09	Human	Nigeria
MK117992	LASV/H.sapiens wt/NGA/2018/IRR 060	S	2018 02 03	Human	Nigeria
MK117993	LASV/H.sapiens wt/NGA/2018/IRR 061	S	2018 02 07	Human	Nigeria
MK117994	LASV/H.sapiens wt/NGA/2018/IRR 063	S	2018 02 07	Human	Nigeria
MK117996	LASV/H.sapiens wt/NGA/2018/IRR 065	S	2018 02 10	Human	Nigeria
MK117997	LASV/H.sapiens wt/NGA/2018/IRR 066	S	2018 02 10	Human	Nigeria
MK117857	LASV/H.sapiens wt/NGA/2018/IRR 066 I	S	2018 02 10	Human	Nigeria
MK117998	LASV/H.sapiens wt/NGA/2018/IRR 071	S	2018 02 11	Human	Nigeria
MK117999	LASV/H.sapiens wt/NGA/2018/IRR 072	S	2018 02 12	Human	Nigeria
MK117858	LASV/H.sapiens wt/NGA/2018/IRR 072 I	S	2018 02 12	Human	Nigeria
MK118000	LASV/H.sapiens wt/NGA/2018/IRR 073	S	2018 02 12	Human	Nigeria
MK117859	LASV/H.sapiens wt/NGA/2018/IRR 073 I	S	2018 02 12	Human	Nigeria
MK118001	LASV/H.sapiens wt/NGA/2018/IRR 074	S	2018 02 12	Human	Nigeria
MK117860	LASV/H.sapiens wt/NGA/2018/IRR 074 I	S	2018 02 12	Human	Nigeria
MK117861	LASV/H.sapiens wt/NGA/2018/IRR 075 I	S	2018 02 12	Human	Nigeria
MK118003	LASV/H.sapiens wt/NGA/2018/IRR 077	S	2018 02 12	Human	Nigeria
MK118008	LASV/H.sapiens wt/NGA/2018/IRR 083	S	2018 02 13	Human	Nigeria
MK118009	LASV/H.sapiens wt/NGA/2018/IRR 084	S	2018 02 13	Human	Nigeria
MK118010	LASV/H.sapiens wt/NGA/2018/IRR 085	S	2018 02 14	Human	Nigeria
MK118013	LASV/H.sapiens wt/NGA/2018/IRR 091	S	2018 02 15	Human	Nigeria
MK118014	LASV/H.sapiens wt/NGA/2018/IRR 092	S	2018 02 15	Human	Nigeria
MK118015	LASV/H.sapiens wt/NGA/2018/IRR 093	S	2018 02 15	Human	Nigeria
MK118016	LASV/H.sapiens wt/NGA/2018/IRR 095	S	2018 02 15	Human	Nigeria
MK118017	LASV/H.sapiens wt/NGA/2018/IRR 096	S	2018 02 17	Human	Nigeria
MK118018	LASV/H.sapiens wt/NGA/2018/IRR 099	S	2018 02 15	Human	Nigeria
MK118020	LASV/H.sapiens wt/NGA/2018/IRR 101	S	2018 02 12	Human	Nigeria
MK118021	LASV/H.sapiens wt/NGA/2018/IRR 103	S	2018 02 18	Human	Nigeria
MK118022	LASV/H.sapiens wt/NGA/2018/IRR 106	S	2018 02 20	Human	Nigeria
MK118025	LASV/H.sapiens wt/NGA/2018/IRR 115	S	2018 02 21	Human	Nigeria
MK117862	LASV/H.sapiens wt/NGA/2018/IRR 115 I	S	2018 02 21	Human	Nigeria
MK118026	LASV/H.sapiens wt/NGA/2018/IRR 117	S	2018 02 24	Human	Nigeria
MK118028	LASV/H.sapiens wt/NGA/2018/IRR 120	S	2018 02 25	Human	Nigeria
MK118029	LASV/H.sapiens wt/NGA/2018/IRR 121	S	2018 02 26	Human	Nigeria
MK118030	LASV/H.sapiens wt/NGA/2018/IRR 126	S	2018 02 28	Human	Nigeria
MK117864	LASV/H.sapiens wt/NGA/2018/IRR 126 I	S	2018 02 28	Human	Nigeria
MK118031	LASV/H.sapiens wt/NGA/2018/IRR 131	S	2018 03 01	Human	Nigeria
MK117865	LASV/H.sapiens wt/NGA/2018/IRR 131 I	S	2018 03 01	Human	Nigeria
MK118033	LASV/H.sapiens wt/NGA/2018/IRR 135	S	2018 03 05	Human	Nigeria
MK118036	LASV/H.sapiens wt/NGA/2018/IRR 138	S	2018 03 08	Human	Nigeria
MK118038	LASV/H.sapiens wt/NGA/2018/IRR 141	S	2018 02 23	Human	Nigeria
KM822000	LASV003 NIG 2008	S	2008	Human	Nigeria
KM822002	LASV006 NIG 2008	S	2008	Human	Nigeria
KM822004	LASV035 NIG 2009	S	2009	Human	Nigeria
KM822006	LASV042 NIG 2009	S	2009	Human	Nigeria
KM822008	LASV045 NIG 2009	S	2009	Human	Nigeria
KM822010	LASV046 NIG 2009	S	2009	Human	Nigeria
KM822012	LASV049 NIG 2009	S	2009	Human	Nigeria
KM822014	LASV052 NIG 2008	S	2008	Human	Nigeria
KM822016	LASV056 NIG 2008	S	2008	Human	Nigeria
KM822018	LASV058 NIG 2008	S	2008	Human	Nigeria
KM822020	LASV063 NIG 2009	S	2009	Human	Nigeria
KM822101	LASV1000 NIG 2009	S	2009	Human	Nigeria
KM822103	LASV1008 NIG 2009	S	2009	Human	Nigeria
KM822105	LASV1011 NIG 2009	S	2009	Human	Nigeria
KM822107	LASV1015 NIG 2009	S	2009	Human	Nigeria
KM822109	LASV1016 NIG 2009	S	2009	Human	Nigeria
KM822022	LASV221 NIG 2010	S	2010	Human	Nigeria
KM822023	LASV224 NIG 2010	S	2010	Human	Nigeria
KM822035	LASV242 NIG 2010	S	2010	Human	Nigeria
KM822037	LASV245 NIG 2011	S	2011	Human	Nigeria
KM822039	LASV246 NIG 2010	S	2010	Human	Nigeria
KM822041	LASV250 NIG 2011	S	2011	Human	Nigeria
KM822043	LASV251 NIG 2010	S	2010	Human	Nigeria
KM822045	LASV253 NIG 2011	S	2011	Human	Nigeria
KM822047	LASV254 NIG 2011	S	2011	Human	Nigeria
KM822049	LASV256 NIG 2010	S	2010	Human	Nigeria
KM822051	LASV263 NIG 2011	S	2011	Human	Nigeria
KM822053	LASV267 NIG 2010	S	2010	Human	Nigeria
KM822055	LASV271 NIG 2010	S	2010	Human	Nigeria
KM822057	LASV274 NIG 2010	S	2010	Human	Nigeria
KM822059	LASV711 NIG 2009	S	2009	Human	Nigeria
KM822060	LASV716 NIG 2009	S	2009	Human	Nigeria
KM822062	LASV719 NIG 2009	S	2009	Human	Nigeria
KM822063	LASV736 NIG 2009	S	2009	Human	Nigeria
KM822065	LASV737 NIG 2009	S	2009	Human	Nigeria
KM822066	LASV738 NIG 2009	S	2009	Human	Nigeria
KM822067	LASV746 NIG 2009	S	2009	Human	Nigeria
KM822069	LASV966 NIG 2009	S	2009	Human	Nigeria
KM822071	LASV967 NIG 2009	S	2009	Human	Nigeria
KM822072	LASV969 NIG 2009	S	2009	Human	Nigeria
KM822074	LASV971 NIG 2009	S	2009	Human	Nigeria
KM822076	LASV975 NIG 2009	S	2009	Human	Nigeria
KM822078	LASV976 NIG 2009	S	2009	Human	Nigeria
KM822080	LASV977 NIG 2009	S	2009	Human	Nigeria
KM822082	LASV978 NIG 2009	S	2009	Human	Nigeria
KM822084	LASV979 NIG 2009	S	2009	Human	Nigeria
KM822086	LASV981 NIG 2009	S	2009	Human	Nigeria
KM822088	LASV982 NIG 2009	S	2009	Human	Nigeria
KM822089	LASV988 NIG 2009	S	2009	Human	Nigeria
KM822091	LASV989 NIG 2009	S	2009	Human	Nigeria
KM822093	LASV990 NIG 2009	S	2009	Human	Nigeria
KM822095	LASV991 NIG 2009	S	2009	Human	Nigeria
KM822097	LASV992 NIG 2009	S	2009	Human	Nigeria
KM822099	LASV993 NIG 2009	S	2009	Human	Nigeria
MK117970	LASV/H.sapiens wt/NGA/2018/IRR 024	S	2018 01 19	Human	Nigeria
KT992422	ONM 299	S	2011 10 23	Mouse	Nigeria
KT992423	ONM 314	S	2011 10 24	Mouse	Nigeria
KT992424	ONM 700	S	2012 10 29	Mouse	Nigeria
MH053475	Lassa virus/H.sapiens wt/NGA/2015/ISTH 0831	S	2015 12 30	Human	Nigeria
MK107899	LASV/H.sapiens tc/NGA/2013/IRR 014	S	2013 11 23	Human	Nigeria
MK107945	LASV/H.sapiens tc/NGA/2013/IRR 015	S	2013 12 04	Human	Nigeria
MK107900	LASV/H.sapiens tc/NGA/2013/IRR 016	S	2013 12 08	Human	Nigeria
MK107910	LASV/H.sapiens tc/NGA/2014/IRR 002	S	2014 01 20	Human	Nigeria
MK107947	LASV/H.sapiens tc/NGA/2014/IRR 003	S	2014 04 07	Human	Nigeria
MK107898	LASV/H.sapiens tc/NGA/2012/IRR 010	S	2012 05 28	Human	Nigeria
MK107965	LASV/H.sapiens tc/NGA/2013/IRR 002	S	2013 01 17	Human	Nigeria
MK107968	LASV/H.sapiens tc/NGA/2013/IRR 003	S	2013 01 18	Human	Nigeria
MG812635	807876	S	1981	Human	Nigeria
MH887809	H.sapiens wt/NGA/2018/LASV0142 IMO 2018	S	2018 01 19	Human	Nigeria
MH053480	Lassa virus/H.sapiens wt/NGA/2015/ISTH 0789	S	2015 12 15	Human	Nigeria
MH053482	Lassa virus/H.sapiens wt/NGA/2016/ISTH 1541	S	2016 10 13	Human	Nigeria
MH053468	Lassa virus/H.sapiens wt/NGA/2016/ISTH 1546	S	2016 10 16	Human	Nigeria
KM821980	ISTH2121 NIG 2012	S	2012	Human	Nigeria
MH053463	Lassa virus/H.sapiens wt/NGA/2016/ISTH 0917	S	2016 03 13	Human	Nigeria
MH053476	Lassa virus/H.sapiens wt/NGA/2016/ISTH 0717	S	2016 02 23	Human	Nigeria
GU481070	Nig08 A18	S	2008	Human	Nigeria
GU481072	Nig08 A19	S	2008	Human	Nigeria
MH053474	Lassa virus/H.sapiens wt/NGA/2016/ISTH 0621	S	2016 02 12	Human	Nigeria
MH053470	Lassa virus/H.sapiens wt/NGA/2016/ISTH 0419	S	2016 01 28	Human	Nigeria
MK107912	LASV/H.sapiens tc/NGA/2015/IRR 008	S	2015 04 10	Human	Nigeria
MK107911	LASV/H.sapiens tc/NGA/2015/IRR 009	S	2015 04 25	Human	Nigeria
MK107959	LASV/H.sapiens tc/NGA/2012/IRR 002	S	2012 02 10	Human	Nigeria
MK117849	LASV/H.sapiens wt/NGA/2017/IRR 001	S	2017 01 24	Human	Nigeria
MK117952	LASV/H.sapiens wt/NGA/2018/IRR 001	S	2018 01 02	Human	Nigeria
MK117852	LASV/H.sapiens wt/NGA/2018/IRR 001 I	S	2018 01 02	Human	Nigeria
MK107960	LASV/H.sapiens tc/NGA/2012/IRR 003	S	2012 02 10	Human	Nigeria
MH053472	Lassa virus/H.sapiens wt/NGA/2016/ISTH 1604	S	2016 11 05	Human	Nigeria
MH053589	Lassa virus/H.sapiens wt/NGA/2016/ISTH 1609	S	2016 11 01	Human	Nigeria
MK107914	LASV/H.sapiens tc/NGA/2015/IRR 014	S	2015 12 30	Human	Nigeria
MK107953	LASV/H.sapiens tc/NGA/2016/IRR 005	S	2016 01 08	Human	Nigeria
MK107949	LASV/H.sapiens tc/NGA/2015/IRR 015	S	2015 12 30	Human	Nigeria
MK107931	LASV/H.sapiens tc/NGA/2016/IRR 008	S	2016 01 20	Human	Nigeria
MK107939	LASV/H.sapiens tc/NGA/2016/IRR 009	S	2016 01 20	Human	Nigeria
MK107940	LASV/H.sapiens tc/NGA/2016/IRR 003	S	2016 01 04	Human	Nigeria
MK107918	LASV/H.sapiens tc/NGA/2016/IRR 014	S	2016 01 28	Human	Nigeria
MK107933	LASV/H.sapiens tc/NGA/2016/IRR 015	S	2016 02 03	Human	Nigeria
MK107932	LASV/H.sapiens tc/NGA/2016/IRR 011	S	2016 01 24	Human	Nigeria
MK107919	LASV/H.sapiens tc/NGA/2016/IRR 019	S	2016 02 12	Human	Nigeria
MK107935	LASV/H.sapiens tc/NGA/2016/IRR 020	S	2016 02 15	Human	Nigeria
MK107929	LASV/H.sapiens tc/NGA/2016/IRR 023	S	2016 02 23	Human	Nigeria
MK107917	LASV/H.sapiens tc/NGA/2016/IRR 012	S	2016 01 25	Human	Nigeria
MK107930	LASV/H.sapiens tc/NGA/2016/IRR 016	S	2016 02 06	Human	Nigeria
MH053478	Lassa virus/H.sapiens wt/NGA/2016/ISTH 0187	S	2016 01 17	Human	Nigeria
MK107921	LASV/H.sapiens tc/NGA/2016/IRR 025	S	2016 02 26	Human	Nigeria
MK107920	LASV/H.sapiens tc/NGA/2016/IRR 028	S	2016 02 29	Human	Nigeria
MK107954	LASV/H.sapiens tc/NGA/2016/IRR 031	S	2016 03 11	Human	Nigeria
MK107934	LASV/H.sapiens tc/NGA/2016/IRR 032	S	2016 03 13	Human	Nigeria
MK117971	LASV/H.sapiens wt/NGA/2018/IRR 025	S	2018 01 19	Human	Nigeria
MK117989	LASV/H.sapiens wt/NGA/2018/IRR 054	S	2018 02 04	Human	Nigeria
MK118034	LASV/H.sapiens wt/NGA/2018/IRR 136	S	2018 03 05	Human	Nigeria
MK118011	LASV/H.sapiens wt/NGA/2018/IRR 086	S	2018 02 08	Human	Nigeria
SGU830839	BA366	S	2003	Mouse	Guinea
KM822111	LM032 SLE 2010	S	2010	Mouse	Sierra Leone
KM822113	LM222 SLE 2010	S	2010	Mouse	Sierra Leone
KM822115	LM395 SLE 2009	S	2009	Mouse	Sierra Leone
KM822117	LM765 SLE 2012	S	2012	Mouse	Sierra Leone
KM822118	LM771 SLE 2012	S	2012	Mouse	Sierra Leone
KM822120	LM774 SLE 2012	S	2012	Mouse	Sierra Leone
KM822122	LM776 SLE 2012	S	2012	Mouse	Sierra Leone
KM822124	LM778 SLE 2012	S	2012	Mouse	Sierra Leone
KM822126	LM779 SLE 2012	S	2012	Mouse	Sierra Leone
KT992416	Mad39	S	2014 05 08	Mouse	Guinea
KT992417	Mad41	S	2014 05 08	Mouse	Guinea
KT992418	Mad62	S	2014 05 09	Mouse	Guinea
KT992419	Mad63	S	2014 05 09	Mouse	Guinea
KT992420	Mad69	S	2014 05 09	Mouse	Guinea
KT992421	Mad83	S	2014 05 10	Mouse	Guinea
MW039388	NYA 44	S	2014 04 28	Mouse	Sierra Leone
MW039389	YAK 02	S	2014 04 10	Mouse	Sierra Leone
MW039390	YAK 08	S	2014 04 10	Mouse	Sierra Leone
MW039391	YAK 20	S	2014 04 11	Mouse	Sierra Leone
KM822130	Z0947 SLE 2011	S	2011	Mouse	Sierra Leone
KM822132	Z0948 SLE 2011	S	2011	Mouse	Sierra Leone
MW004547	Josiah GPA	S	2011	Guinea Pig	NA
MN275173	LF2384 NS DIA 1	S	2012	Human	Sierra Leone
GU830817	Lib05 2406/129	S	2005	Human	Liberia
GU830818	Lib05 3800	S	2005	Human	Liberia
GU830814	Lib05 406/90	S	2005	Human	Liberia
GU830819	Lib05 4094	S	2005	Human	Liberia
GU830820	Lib06 120	S	2006	Human	Liberia
GU830821	Lib06 174	S	2006	Human	Liberia
GU830822	Lib06 295	S	2006	Human	Liberia
MG812679	811606	S	2010	Human	Liberia
MG812639	806827	S	1977	Human	Sierra Leone
MG812648	803204	S	1972	Human	Liberia
MG812647	803209	S	1975	Human	Sierra Leone
MG812645	806387	S	1981	Human	Guinea
MG812636	806829	S	1981	Human	Liberia
MG812632	807978	S	1981	Human	Liberia
MG812631	807987	S	1981	Human	Liberia
MG812685	807988	S	1996	Human	Guinea
MG812683	808714	S	1980	Human	Sierra Leone
MG812658	812337	S	2014	Human	Liberia
MG812650	812673	S	2015	Human	Liberia
KY425650	IRF0172	S	1976 03	Human	Sierra Leone
KY425642	IRF0185	S	NA	Human	Guinea
KY425638	IRF0193	S	1976 03	Human	Sierra Leone
KY425635	IRF0194	S	NA	Human	Guinea
KY425641	IRF0201	S	1976 03	Human	Sierra Leone
KY425643	IRF0205	S	1976 03	Human	Sierra Leone
JN650517	Josiah	S	1976 03 11	Human	Sierra Leone
MG812653	LF11003	S	2011 02 20	Human	Liberia
MG812655	LF11011	S	2011 04 14	Human	Liberia
MG812657	LF13006	S	2013 04 29	Human	Liberia
MG812661	LF13007	S	2013 04 29	Human	Liberia
MG812663	LF16004	S	2016 02 26	Human	Liberia
MG812665	LF16016	S	2016 04 13	Human	Liberia
MG812673	LF17001	S	2017 01 09	Human	Liberia
MG812667	LF17007	S	2017 01 09	Human	Liberia
MG812677	LF17013	S	2017 02 13	Human	Liberia
MG812669	LF17019	S	NA	Human	Liberia
MG812670	LF17020	S	2017 05 02	Human	Liberia
MH215279	LF18001	S	2018 01 10	Human	Liberia
MH215281	LF18002	S	2018 01 10	Human	Liberia
MH215283	LF18037	S	2018 02 13	Human	Liberia
MH215285	LF18040	S	2018 03 02	Human	Liberia
MH215287	LF18041	S	2018 03 03	Human	Liberia
MH215289	LF18042	S	2018 03 01	Human	Liberia
KM821794	G1180 SLE 2010	S	2010	Human	Sierra Leone
KM821796	G1190 SLE 2010	S	2010	Human	Sierra Leone
KM821798	G1200 LIB 2010	S	2010	Human	Liberia
KM821800	G1442 SLE 2011	S	2011	Human	Sierra Leone
KM821802	G1529 SLE 2011	S	2011	Human	Sierra Leone
KM821804	G1618 SLE 2011	S	2011	Human	Sierra Leone
KM821806	G1646 SLE 2011	S	2011	Human	Sierra Leone
KM821808	G1647 SLE 2011	S	2011	Human	Sierra Leone
KM821810	G1727 SLE 2011	S	2011	Human	Sierra Leone
KM821812	G1774 SLE 2011	S	2011	Human	Sierra Leone
KM821814	G1792 SLE 2011	S	2011	Human	Sierra Leone
KM821815	G1897 SLE 2011	S	2011	Human	Sierra Leone
KM821816	G1932 SLE 2011	S	2011	Human	Sierra Leone
KM821818	G1959 SLE 2011	S	2011	Human	Sierra Leone
KM821820	G1960 SLE 2011	S	2011	Human	Sierra Leone
KM821822	G2141 SLE 2011	S	2011	Human	Sierra Leone
KM821824	G2147 SLE 2011	S	2011	Human	Sierra Leone
KM821826	G2165 SLE 2011	S	2011	Human	Sierra Leone
KM821828	G2184 SLE 2011	S	2011	Human	Sierra Leone
KM821830	G2197 SLE 2011	S	2011	Human	Sierra Leone
KM821832	G2222 SLE 2011	S	2011	Human	Sierra Leone
KM821833	G2230 SLE 2012	S	2012	Human	Sierra Leone
KM821835	G2259 SLE 2012	S	2012	Human	Sierra Leone
KM821837	G2263 SLE 2012	S	2012	Human	Sierra Leone
KM821839	G2280 SLE 2012	S	2012	Human	Sierra Leone
KM821841	G2295 SLE 2012	S	2012	Human	Sierra Leone
KM821843	G2315 SLE 2012	S	2012	Human	Sierra Leone
KM821845	G2318 SLE 2012	S	2012	Human	Sierra Leone
KM821847	G2363 SLE 2012	S	2012	Human	Sierra Leone
KM821848	G2384 SLE 2012	S	2012	Human	Sierra Leone
KM821850	G2392 SLE 2012	S	2012	Human	Sierra Leone
KM821852	G2405 SLE 2012	S	2012	Human	Sierra Leone
KM821854	G2427 SLE 2012	S	2012	Human	Sierra Leone
KM821856	G2431 SLE 2012	S	2012	Human	Sierra Leone
KM821857	G2511 SLE 2012	S	2012	Human	Sierra Leone
KM821859	G2554 SLE 2012	S	2012	Human	Sierra Leone
KM821861	G2557 SLE 2012	S	2012	Human	Sierra Leone
KM821863	G2565 SLE 2012	S	2012	Human	Sierra Leone
KM821865	G2587 SLE 2012	S	2012	Human	Sierra Leone
KM821867	G2612 SLE 2012	S	2012	Human	Sierra Leone
KM821869	G2615 SLE 2012	S	2012	Human	Sierra Leone
KM821871	G2723 SLE 2012	S	2012	Human	Sierra Leone
KM821872	G2789 SLE 2012	S	2012	Human	Sierra Leone
KM821874	G2868 SLE 2012	S	2012	Human	Sierra Leone
KM821876	G2903 SLE 2012	S	2012	Human	Sierra Leone
KM821877	G2906 SLE 2012	S	2012	Human	Sierra Leone
KM821878	G2934 SLE 2012	S	2012	Human	Sierra Leone
KM821880	G2944 SLE 2012	S	2012	Human	Sierra Leone
KM821882	G3010 SLE 2013	S	2013	Human	Sierra Leone
KM821884	G3016 SLE 2013	S	2013	Human	Sierra Leone
KM821885	G3034 SLE 2013	S	2013	Human	Sierra Leone
KM821886	G3076 SLE 2013	S	2013	Human	Sierra Leone
KM821887	G3101 SLE 2013	S	2013	Human	Sierra Leone
KM821889	G3106 SLE 2013	S	2013	Human	Sierra Leone
KM821890	G3110 SLE 2013	S	2013	Human	Sierra Leone
KM821892	G3148 SLE 2013	S	2013	Human	Sierra Leone
KM821894	G3151 SLE 2013	S	2013	Human	Sierra Leone
KM821895	G3157 SLE 2013	S	2013	Human	Sierra Leone
KM821897	G3170 SLE 2013	S	2013	Human	Sierra Leone
KM821899	G3206 SLE 2013	S	2013	Human	Sierra Leone
KM821900	G3222 SLE 2013	S	2013	Human	Sierra Leone
KM821902	G3229 SLE 2013	S	2013	Human	Sierra Leone
KM821904	G3234 SLE 2013	S	2013	Human	Sierra Leone
KM821906	G3248 SLE 2013	S	2013	Human	Sierra Leone
KM821907	G3253 SLE 2013	S	2013	Human	Sierra Leone
KM821909	G3278 SLE 2013	S	2013	Human	Sierra Leone
KM821910	G3283 SLE 2013	S	2013	Human	Sierra Leone
KM821773	G502 SLE 2009	S	2009	Human	Sierra Leone
KM821775	G503 SLE 2009	S	2009	Human	Sierra Leone
KM821777	G610 SLE 2009	S	2009	Human	Sierra Leone
KM821779	G636 SLE 2009	S	2009	Human	Sierra Leone
KM821781	G676 SLE 2009	S	2009	Human	Sierra Leone
KM821783	G692 SLE 2009	S	2009	Human	Sierra Leone
KM821785	G693 SLE 2009	S	2009	Human	Sierra Leone
KM821787	G733 SLE 2010	S	2010	Human	Sierra Leone
KM821789	G771 SLE 2010	S	2010	Human	Sierra Leone
KM821790	G806 SLE 2010	S	2010	Human	Sierra Leone
KM821792	G808 SLE 2010	S	2010	Human	Sierra Leone
KF478768	Ouoma R123	S	2012 03	Mouse	Mali
KF478766	Bamba R114	S	2012 03	Mouse	Mali
KF478767	Komina R16	S	2012 03 03	Mouse	Mali
KF478765	Soromba R	S	2009 06	Mouse	Mali
MK656414	LASV 3604	S	2015 08 28	Mouse	Cote dIvoire
MK656416	LASV 3625	S	2015 08 29	Mouse	Cote dIvoire
MK656418	LASV 3630	S	2015 08 29	Mouse	Cote dIvoire
MK656425	LASV 3713	S	2015 09 07	Mouse	Cote dIvoire
MK656426	LASV 3715	S	2015 09 07	Mouse	Cote dIvoire
MK656421	LASV CIV139	S	2013 08 22	Mouse	Cote dIvoire
MK656419	LASV R124	S	2013 08 20	Mouse	Cote dIvoire
MK656420	LASV R132	S	2013 08 22	Mouse	Cote dIvoire
KU961971	Togo/2016/7082	S	2016 02 26	Human	Togo
MF990889	Lassa/H.sapiens tc/TGO/2016/812939	S	2016 03 12	Human	Togo
MF990888	Lassa/H.sapiens wt/TGO/2016/201600568	S	2016 03 12	Human	Togo
MT193285	BEN 14 26529	S	2014 10 25	Human	Benin
MT193284	BEN 14 26530	S	2014 10 23	Human	Benin
MT193288	BEN 16 3488	S	2016 01 21	Human	Benin
MT193287	BEN 16 3489	S	2016 01 21	Human	Benin
MT193286	BEN 16 3490	S	2016 01 21	Human	Benin
MT193277	BEN 16069	S	2016 02 23	Human	Benin
MT193278	BEN 16070	S	2016 01 29	Human	Benin
MT193279	BEN 16071	S	2016 02 07	Human	Benin
MT193283	BEN 16081	S	2016 01 30	Human	Benin
MT193280	BEN 16082	S	2016 03 05	Human	Benin
MT193281	BEN 16090	S	2016 03 13	Human	Benin
MT193282	BEN 16131	S	2016 04 10	Human	Benin
KT992425	KAK 428	S	2012 03 15	Rodent	Nigeria
MK107927	LASV/H.sapiens tc/NGA/2016/IRR 006	S	2016 01 14	Human	Nigeria
